# Supplementary material for: Brachyury engineers cardiac repair competent stem cells
Source: PubMed Central journal article supplement (PMC7900595; doi:10.1002/sctm.20-0193), 2020-10-24
Supplement: SCT3-10-385-s006.pdf [file SCT3-10-385-s006.pdf]

| gene_id          | logFC       | logCPM       | P Value     | FDR         | gene_name     | gene_biotype                       | diff_median_len |
|------------------|-------------|--------------|-------------|-------------|---------------|------------------------------------|-----------------|
| ENSG00000206073  | 5.955721901 | -1.430702088 | 4.99E-06    | 0.00010549  | SERPINB4      | protein_coding                     | 912.5           |
| ENSG00000225826  | 5.527510627 | -2.349950395 | 7.74E-05    | 0.001117988 | LINC00626     | lincRNA                            | 955             |
| ENSG00000164458  | 5.442818032 | 6.567654347  | 1.34E-109   | 9.25E-106   | T             | protein_coding                     | 1873.5          |
| ENSG00000174576  | 5.106922045 | -1.971155833 | 0.00221149  | 0.016988414 | NPAS4         | protein_coding                     | 2454            |
| ENSG00000069122  | 4.963062124 | -2.291568856 | 0.003152417 | 0.022301726 | ADGRF5        | protein_coding                     | 3138.5          |
| ENSG00000198400  | 4.959976084 | -2.155937257 | 0.000978742 | 0.008905439 | NTRK1         | protein_coding                     | 2462            |
| ENSG00000206965  | 4.802774994 | -2.820777958 | 0.003177845 | 0.022437771 | RNU6-5P       | snRNA                              | 107             |
| ENSG00000279322  | 4.649767831 | -2.82139134  | 0.004629573 | 0.030158489 | RP4-738P15.6  | TEC                                | 288             |
| ENSG00000162951  | 4.024738423 | -2.080393427 | 4.38E-05    | 0.000690771 | LRRMT1        | protein_coding                     | 2126            |
| ENSG00000112559  | 4.001803792 | 0.626282507  | 7.63E-22    | 1.74E-19    | MDFI          | protein_coding                     | 703             |
| ENSG00000064300  | 3.819564443 | 2.445177477  | 1.93E-49    | 3.08E-46    | NGFR          | protein_coding                     | 1840            |
| ENSG00000117318  | 3.765414715 | 7.154623954  | 1.51E-206   | 3.13E-202   | ID3           | protein_coding                     | 892             |
| ENSG00000198523  | 3.679184206 | -0.991917926 | 2.70E-08    | 9.87E-07    | PLN           | protein_coding                     | 2001            |
| ENSG00000262477  | 3.575018297 | -2.631657123 | 0.002697042 | 0.019770986 | AC021224.1    | lincRNA                            | 857             |
| ENSG00000226012  | 3.56622789  | -2.249047824 | 0.001147279 | 0.010088745 | AP001434.2    | lincRNA                            | 287             |
| ENSG00000175899  | 3.472501947 | 0.121939944  | 2.23E-14    | 2.35E-12    | A2M           | protein_coding                     | 590             |
| ENSG00000119283  | 3.453286285 | -2.072757948 | 0.001910016 | 0.015166614 | TRIM67        | protein_coding                     | 3936            |
| ENSG00000136244  | 3.400728848 | 3.87873956   | 2.93E-72    | 1.21E-68    | IL6           | protein_coding                     | 765             |
| ENSG00000230699  | 3.314916107 | -0.442990936 | 1.28E-10    | 7.34E-09    | RP11-5407.1   | lincRNA                            | 3043            |
| ENSG00000172201  | 3.277212657 | 1.46001106   | 3.36E-27    | 1.29E-24    | ID4           | protein_coding                     | 2344            |
| ENSG00000123243  | 3.204375049 | -1.129035707 | 6.30E-07    | 1.69E-05    | ITIH5         | protein_coding                     | 2651            |
| ENSG00000260633  | 3.197814265 | -2.608091597 | 0.006359426 | 0.038451779 | RP11-375I20.6 | lincRNA                            | 1946            |
| ENSG00000231231  | 3.172511296 | -1.710638464 | 0.000358782 | 0.003960563 | LINC01423     | lincRNA                            | 515.5           |
| ENSG00000066468  | 3.17157946  | 0.331121876  | 1.40E-18    | 2.30E-16    | FGFR2         | protein_coding                     | 2621.5          |
| ENSG00000147689  | 3.09577051  | -2.153455095 | 0.000339895 | 0.003786002 | FAM83A        | protein_coding                     | 1131            |
| ENSG00000127588  | 3.095634573 | -0.978372922 | 0.00037228  | 0.004076973 | GNG13         | protein_coding                     | 984             |
| ENSG00000101425  | 3.036827968 | -1.162979515 | 5.78E-07    | 1.56E-05    | BPI           | protein_coding                     | 654.5           |
| ENSG00000128262  | 3.021872616 | -0.025771606 | 3.35E-09    | 1.52E-07    | POM121L9P     | transcribed_unprocessed_pseudogene | 1285            |
| ENSG00000184160  | 3.008320941 | 0.471894865  | 1.61E-15    | 2.01E-13    | ADRA2C        | protein_coding                     | 1864.5          |
| ENSG00000017427  | 3.007734793 | 0.410550846  | 2.53E-12    | 1.92E-10    | IGF1          | protein_coding                     | 761             |
| ENSG00000184845  | 2.918193004 | -2.530770543 | 0.000765035 | 0.007297611 | DRD1          | protein_coding                     | 4054            |
| ENSG00000165694  | 2.917883621 | -1.996928982 | 0.001420518 | 0.01201848  | FRMD7         | protein_coding                     | 2864            |
| ENSG00000115468  | 2.885471189 | -1.101453689 | 8.19E-05    | 0.001173686 | EFHD1         | protein_coding                     | 1490            |
| ENSG00000166920  | 2.831390547 | -2.233196049 | 0.001542243 | 0.01277532  | C15orf48      | protein_coding                     | 547             |
| ENSG00000125968  | 2.825508385 | 5.728884926  | 2.78E-115   | 2.87E-111   | ID1           | protein_coding                     | 1113.5          |
| ENSG00000183691  | 2.795421611 | -2.439437053 | 0.001056949 | 0.009450932 | NOG           | protein_coding                     | 1892            |
| ENSG00000187398  | 2.795002413 | -1.313953975 | 1.25E-07    | 3.97E-06    | LUZP2         | protein_coding                     | 2288            |
| ENSG00000170382  | 2.771550843 | -1.493332645 | 8.61E-07    | 2.23E-05    | LRRN2         | protein_coding                     | 3337            |
| ENSG00000211448  | 2.753104371 | -0.171011843 | 1.37E-12    | 1.07E-10    | DIO2          | protein_coding                     | 776             |
| ENSG00000163295  | 2.733527159 | -1.52520917  | 2.86E-05    | 0.00047462  | ALPI          | protein_coding                     | 2216            |
| ENSG00000217027  | 2.721153971 | -2.119454092 | 0.004265977 | 0.028261072 | TPT1P4        | processed_pseudogene               | 519             |
| ENSG000000261573 | 2.697101582 | 0.030223028  | 2.85E-11    | 1.80E-09    | RP11-553K8.5  | antisense                          | 416             |
| ENSG00000115844  | 2.670313309 | -2.41993972  | 0.000294673 | 0.00337148  | DLX2          | protein_coding                     | 2152.5          |
| ENSG00000132854  | 2.636326891 | -1.315557144 | 4.11E-06    | 8.87E-05    | KANK4         | protein_coding                     | 2563            |
| ENSG00000173406  | 2.635105069 | 1.635535326  | 1.49E-27    | 6.05E-25    | DAB1          | protein_coding                     | 1150            |
| ENSG00000146674  | 2.634747716 | 10.04796803  | 4.23E-77    | 2.19E-73    | IGFBP3        | protein_coding                     | 810             |
| ENSG00000103196  | 2.630956822 | 6.855524916  | 1.15E-35    | 9.19E-33    | CRISPLD2      | protein_coding                     | 1123            |
| ENSG00000157570  | 2.624219453 | 2.578897388  | 3.43E-31    | 2.15E-28    | TSPAN18       | protein_coding                     | 827             |
| ENSG00000103888  | 2.585768789 | 7.86240396   | 3.94E-37    | 3.54E-34    | CEMIP         | protein_coding                     | 3536            |
| ENSG00000225674  | 2.582763307 | -2.485161086 | 0.006559039 | 0.039359934 | IPO7P2        | processed_pseudogene               | 1750            |
| ENSG00000158050  | 2.544660343 | 1.843196216  | 1.39E-21    | 3.05E-19    | DUSP2         | protein_coding                     | 1230.5          |
| ENSG00000138759  | 2.541492206 | 1.900757746  | 3.91E-18    | 6.23E-16    | FRAS1         | protein_coding                     | 2257            |
| ENSG00000165507  | 2.537327031 | 2.317120468  | 6.71E-37    | 5.55E-34    | C10orf10      | protein_coding                     | 868             |
| ENSG00000133048  | 2.503984481 | 3.417343192  | 2.00E-26    | 6.91E-24    | CHI3L1        | protein_coding                     | 921             |
| ENSG00000129824  | 2.500268531 | -2.356443222 | 0.001875368 | 0.01495456  | RPS4Y1        | protein_coding                     | 904.5           |
| ENSG00000164684  | 2.444440108 | -1.077753306 | 9.63E-06    | 0.000186752 | ZNF704        | protein_coding                     | 566.5           |
| ENSG00000257496  | 2.427853615 | -2.680597523 | 0.006359426 | 0.038451779 | RP11-474P2.4  | lincRNA                            | 562             |
| ENSG00000146197  | 2.407166251 | 7.526711083  | 1.39E-64    | 4.10E-61    | SCUBE3        | protein_coding                     | 7356            |
| ENSG00000162552  | 2.373947339 | -1.74394983  | 0.000630996 | 0.006187166 | WNT4          | protein_coding                     | 680             |
| ENSG00000162267  | 2.369286664 | -0.407974587 | 3.61E-08    | 1.30E-06    | ITIH3         | protein_coding                     | 824             |
| ENSG00000187634  | 2.367883918 | 4.837978055  | 1.30E-38    | 1.28E-35    | SAMD11        | protein_coding                     | 2159            |
| ENSG00000145423  | 2.34792377  | 2.301215188  | 9.80E-19    | 1.66E-16    | SFRP2         | protein_coding                     | 2032            |
| ENSG00000215218  | 2.343026135 | 1.48393491   | 1.73E-18    | 2.79E-16    | UBE2QL1       | protein_coding                     | 4317            |
| ENSG00000250056  | 2.340983535 | 1.348434127  | 1.75E-16    | 2.41E-14    | LINC01018     | lincRNA                            | 1405            |
| ENSG00000124216  | 2.331284709 | 2.915341158  | 2.44E-23    | 6.48E-21    | SNAI1         | protein_coding                     | 1686            |
| ENSG00000124772  | 2.324649151 | -2.330613531 | 0.00708039  | 0.041514696 | CPNE5         | protein_coding                     | 1567            |
| ENSG00000137745  | 2.321049193 | -1.46324991  | 0.000240165 | 0.002837183 | MMP13         | protein_coding                     | 1470            |
| ENSG00000241644  | 2.302005051 | 0.09408158   | 3.57E-11    | 2.22E-09    | INMT          | protein_coding                     | 930             |
| ENSG00000171385  | 2.287851607 | 3.418082578  | 7.72E-23    | 2.00E-20    | KCND3         | protein_coding                     | 2716            |
| ENSG00000011201  | 2.26648865  | -1.285604422 | 4.79E-05    | 0.000746651 | ANOS1         | protein_coding                     | 797             |
| ENSG00000003989  | 2.246415694 | -2.068005113 | 0.002560307 | 0.019038206 | SLC7A2        | protein_coding                     | 7560            |
| ENSG00000185345  | 2.206208859 | -0.115136709 | 5.68E-08    | 1.96E-06    | PARK2         | protein_coding                     | 1157            |
| ENSG00000184557  | 2.197315359 | 3.899808015  | 1.84E-54    | 3.17E-51    | SOCS3         | protein_coding                     | 1547.5          |
| ENSG00000117643  | 2.174661628 | 1.824165471  | 4.01E-19    | 7.03E-17    | MAN1C1        | protein_coding                     | 2544            |
| ENSG00000260941  | 2.170592459 | -1.591103217 | 0.000111161 | 0.001514849 | LINC00622     | sense_overlapping                  | 1570            |
| ENSG00000134198  | 2.168518827 | 3.948479418  | 1.74E-38    | 1.64E-35    | TSPAN2        | protein_coding                     | 732             |
| ENSG00000164694  | 2.159593694 | 3.655239542  | 2.13E-29    | 1.10E-26    | FNDC1         | protein_coding                     | 6034            |
| ENSG00000160161  | 2.150063453 | 3.724768175  | 4.45E-24    | 1.26E-21    | CILP2         | protein_coding                     | 4199            |
| ENSG00000103044  | 2.130759409 | 1.292620809  | 2.37E-14    | 2.46E-12    | HAS3          | protein_coding                     | 1163            |

|                 |             |              |             |             |                |                                    |        |
|-----------------|-------------|--------------|-------------|-------------|----------------|------------------------------------|--------|
| ENSG00000167157 | 2.130239097 | 3.593300213  | 1.84E-41    | 2.00E-38    | PRRX2          | protein_coding                     | 1311   |
| ENSG00000038295 | 2.125583853 | -1.617987521 | 0.000104618 | 0.00144147  | TLL1           | protein_coding                     | 3308   |
| ENSG00000125730 | 2.116614007 | 4.940443752  | 1.57E-56    | 3.22E-53    | C3             | protein_coding                     | 580.5  |
| ENSG00000072274 | 2.114757155 | 7.203768667  | 1.22E-08    | 4.88E-07    | TFRC           | protein_coding                     | 560    |
| ENSG00000128045 | 2.09647996  | -1.05835416  | 1.14E-06    | 2.88E-05    | RASL11B        | protein_coding                     | 1733   |
| ENSG00000149596 | 2.087923389 | 0.57352884   | 7.07E-12    | 5.07E-10    | JPH2           | protein_coding                     | 3355   |
| ENSG00000115594 | 2.087296789 | 7.191757224  | 5.15E-18    | 8.08E-16    | IL1R1          | protein_coding                     | 1678   |
| ENSG00000050628 | 2.080753392 | 0.106986244  | 8.59E-08    | 2.85E-06    | PTGER3         | protein_coding                     | 1904.5 |
| ENSG00000099994 | 2.078563743 | 3.123241041  | 3.08E-27    | 1.20E-24    | SUSD2          | protein_coding                     | 4171   |
| ENSG00000111913 | 2.04904549  | -1.134519733 | 0.000307081 | 0.003494145 | FAM65B         | protein_coding                     | 3614   |
| ENSG00000254204 | 2.033578515 | -2.417276648 | 0.008628225 | 0.047904    | RP11-400K9.3   | lincRNA                            | 469    |
| ENSG00000099998 | 2.028912056 | 3.117631901  | 1.40E-26    | 4.93E-24    | GGT5           | protein_coding                     | 2371   |
| ENSG00000168874 | 1.98144227  | 4.365832107  | 3.99E-20    | 7.72E-18    | ATOH8          | protein_coding                     | 1893   |
| ENSG00000174325 | 1.979307825 | -0.713114315 | 6.65E-05    | 0.000980717 | DIRC1          | protein_coding                     | 1037   |
| ENSG00000233901 | 1.979236079 | 3.320112924  | 6.07E-30    | 3.22E-27    | LINC01503      | lincRNA                            | 664    |
| ENSG00000206052 | 1.978101956 | 0.02710769   | 8.18E-09    | 3.43E-07    | DOK6           | protein_coding                     | 506    |
| ENSG00000126010 | 1.977105045 | -1.428079793 | 0.002310356 | 0.017553736 | GRPR           | protein_coding                     | 1929   |
| ENSG00000146477 | 1.963064769 | -0.889561038 | 4.00E-05    | 0.000637701 | SLC22A3        | protein_coding                     | 3348   |
| ENSG00000130600 | 1.959822196 | 7.215560677  | 1.27E-18    | 2.11E-16    | H19            | processed_transcript               | 1546.5 |
| ENSG00000137834 | 1.954361341 | 3.199416997  | 2.16E-21    | 4.56E-19    | SMAD6          | protein_coding                     | 1401   |
| ENSG00000116039 | 1.945195991 | -0.664653328 | 4.30E-05    | 0.000680474 | ATP6V1B1       | protein_coding                     | 718.5  |
| ENSG00000072952 | 1.941398822 | 3.575970348  | 1.46E-25    | 4.64E-23    | MRV1           | protein_coding                     | 2468   |
| ENSG00000272970 | 1.936970445 | -1.06695824  | 0.000286335 | 0.003288799 | RP11-329B9.4   | lincRNA                            | 701    |
| ENSG00000187955 | 1.934903994 | 7.520335974  | 7.27E-11    | 4.33E-09    | COL14A1        | protein_coding                     | 3244   |
| ENSG00000106538 | 1.934052833 | 4.262779053  | 8.23E-28    | 3.55E-25    | RARRES2        | protein_coding                     | 740    |
| ENSG00000221852 | 1.926731215 | -1.350852325 | 0.008411404 | 0.047104318 | KRTAP1-5       | protein_coding                     | 1177   |
| ENSG00000206932 | 1.919276182 | -2.004104491 | 0.003295406 | 0.023040025 | RNU6-4P        | snRNA                              | 107    |
| ENSG00000265018 | 1.919158312 | -0.672870838 | 4.50E-05    | 0.000706507 | AGAP12P        | transcribed_unprocessed_pseudogene | 2250   |
| ENSG00000161249 | 1.913010741 | -0.045941618 | 2.42E-08    | 8.98E-07    | DMKN           | protein_coding                     | 678.5  |
| ENSG00000155792 | 1.90221575  | 5.069914963  | 4.57E-20    | 8.77E-18    | DEPTOR         | protein_coding                     | 1397   |
| ENSG00000111341 | 1.888523554 | 3.730799641  | 5.02E-15    | 5.94E-13    | MGP            | protein_coding                     | 1005   |
| ENSG00000149131 | 1.887909035 | 5.876088016  | 1.25E-21    | 2.78E-19    | SERPING1       | protein_coding                     | 956    |
| ENSG00000182329 | 1.880639883 | -1.385470994 | 6.76E-05    | 0.000994589 | KIAA2012       | protein_coding                     | 3088.5 |
| ENSG00000148677 | 1.871823673 | 0.759438473  | 4.32E-07    | 1.21E-05    | ANKRD1         | protein_coding                     | 1979   |
| ENSG00000144802 | 1.864989226 | 4.027182774  | 3.38E-07    | 9.74E-06    | NFKBIZ         | protein_coding                     | 877    |
| ENSG00000115738 | 1.86301273  | 5.706203915  | 1.71E-56    | 3.22E-53    | ID2            | protein_coding                     | 992.5  |
| ENSG00000163017 | 1.861207176 | -0.495870977 | 4.87E-06    | 0.000103328 | ACTG2          | protein_coding                     | 927    |
| ENSG00000010932 | 1.85844363  | 2.058167479  | 1.43E-11    | 9.42E-10    | FMO1           | protein_coding                     | 2003   |
| ENSG00000155511 | 1.852174836 | 0.373723699  | 1.72E-11    | 1.12E-09    | GRIA1          | protein_coding                     | 2069   |
| ENSG00000120693 | 1.85080365  | 3.63679782   | 1.08E-44    | 1.39E-41    | SMAD9          | protein_coding                     | 5418   |
| ENSG00000164056 | 1.849523152 | 1.247974604  | 1.46E-09    | 7.16E-08    | SPRY1          | protein_coding                     | 1680   |
| ENSG00000076716 | 1.848455478 | 2.32369804   | 6.26E-18    | 9.68E-16    | GPC4           | protein_coding                     | 4960   |
| ENSG00000125657 | 1.842449768 | 1.679190624  | 1.36E-18    | 2.25E-16    | TNFSF9         | protein_coding                     | 1665   |
| ENSG00000109625 | 1.794021409 | -0.532022327 | 0.00043679  | 0.004624485 | CPZ            | protein_coding                     | 906    |
| ENSG00000167680 | 1.789781083 | 1.503188932  | 4.89E-12    | 3.58E-10    | SEMA6B         | protein_coding                     | 2034   |
| ENSG00000132329 | 1.787222137 | 1.177494482  | 1.54E-10    | 8.77E-09    | RAMP1          | protein_coding                     | 795.5  |
| ENSG00000177283 | 1.784727048 | 4.726770518  | 1.99E-15    | 2.45E-13    | FZD8           | protein_coding                     | 2055.5 |
| ENSG00000122176 | 1.775604672 | 3.781316037  | 5.48E-39    | 5.67E-36    | FMOD           | protein_coding                     | 717    |
| ENSG00000177679 | 1.774729552 | 0.470556627  | 4.73E-07    | 1.31E-05    | SRRM3          | protein_coding                     | 2150   |
| ENSG00000184185 | 1.770467304 | 0.743671264  | 5.68E-09    | 2.47E-07    | KCNJ12         | protein_coding                     | 3811.5 |
| ENSG00000197361 | 1.766407246 | 1.24674848   | 2.66E-08    | 9.75E-07    | FBXL22         | protein_coding                     | 1526   |
| ENSG00000140285 | 1.758026619 | 6.836128598  | 1.69E-63    | 4.38E-60    | FGF7           | protein_coding                     | 1388.5 |
| ENSG00000204174 | 1.754223347 | -0.849949235 | 0.002339583 | 0.017727927 | NPY4R          | protein_coding                     | 1878   |
| ENSG00000118849 | 1.747375503 | 3.543617739  | 1.96E-33    | 1.45E-30    | RARRES1        | protein_coding                     | 532    |
| ENSG00000107796 | 1.746807607 | 8.631987801  | 9.38E-31    | 5.40E-28    | ACTA2          | protein_coding                     | 820    |
| ENSG00000104213 | 1.746151416 | 1.10497186   | 5.52E-09    | 2.42E-07    | PDGFRL         | protein_coding                     | 1901   |
| ENSG00000130751 | 1.732197192 | 1.15471412   | 1.36E-09    | 6.69E-08    | NPAS1          | protein_coding                     | 1052.5 |
| ENSG00000176928 | 1.721588674 | -0.884616098 | 0.000967961 | 0.008815083 | GCNT4          | protein_coding                     | 5554   |
| ENSG00000267565 | 1.720451996 | -1.222203039 | 0.000872032 | 0.008105435 | CTC-559E9.8    | antisense                          | 403    |
| ENSG00000027644 | 1.718771155 | -1.298986951 | 0.008949681 | 0.049305388 | INSRR          | protein_coding                     | 5101   |
| ENSG00000177839 | 1.715108116 | -1.225877291 | 0.002555659 | 0.019017297 | PCDHB9         | protein_coding                     | 616    |
| ENSG00000198948 | 1.712100614 | 4.273834962  | 3.65E-35    | 2.80E-32    | MFAP3L         | protein_coding                     | 564    |
| ENSG00000166979 | 1.71117009  | -0.676501074 | 0.005534145 | 0.034592997 | EVA1C          | protein_coding                     | 1558   |
| ENSG00000224081 | 1.709865364 | 0.360800686  | 1.23E-07    | 3.91E-06    | LINC01057      | transcribed_processed_pseudogene   | 893    |
| ENSG00000234975 | 1.707739885 | -1.002048508 | 0.002672698 | 0.01966663  | FTH1P2         | processed_pseudogene               | 412    |
| ENSG00000109610 | 1.704594665 | 3.317848076  | 1.36E-22    | 3.40E-20    | SOD3           | protein_coding                     | 567    |
| ENSG00000205403 | 1.700066176 | 3.642620458  | 2.03E-21    | 4.34E-19    | CFI            | protein_coding                     | 1914   |
| ENSG00000108691 | 1.696204577 | 4.203729722  | 1.74E-25    | 5.39E-23    | CCL2           | protein_coding                     | 866.5  |
| ENSG00000258667 | 1.69579223  | -1.336816876 | 0.000558262 | 0.005625813 | HIF1A-AS2      | lincRNA                            | 533    |
| ENSG00000196562 | 1.681539321 | 6.632721996  | 4.40E-18    | 6.96E-16    | SULF2          | protein_coding                     | 1066.5 |
| ENSG00000116990 | 1.674368163 | 0.07997233   | 3.78E-07    | 1.07E-05    | MYCL           | protein_coding                     | 1816   |
| ENSG00000115457 | 1.669636201 | 1.092542795  | 8.83E-09    | 3.66E-07    | IGFBP2         | protein_coding                     | 846    |
| ENSG00000082196 | 1.665150458 | 2.013670958  | 1.00E-11    | 6.85E-10    | C1QTNF3        | protein_coding                     | 1474.5 |
| ENSG00000221869 | 1.662550787 | 5.888372528  | 9.20E-17    | 1.29E-14    | CEBPD          | protein_coding                     | 2178   |
| ENSG00000228221 | 1.660453101 | -1.315387831 | 0.003384436 | 0.023541393 | LINC00578      | lincRNA                            | 530.5  |
| ENSG00000254510 | 1.651475161 | -0.889902743 | 0.00061647  | 0.006079272 | RP11-867G23.10 | processed_transcript               | 637    |
| ENSG00000115598 | 1.648700184 | 0.304838707  | 6.05E-07    | 1.63E-05    | IL1RL2         | protein_coding                     | 1485.5 |
| ENSG00000180914 | 1.636753532 | 5.112832957  | 2.38E-16    | 3.22E-14    | OXTR           | protein_coding                     | 671.5  |
| ENSG00000233098 | 1.633909313 | -0.492596638 | 9.28E-05    | 0.001298283 | CCDC144NL-AS1  | antisense                          | 821    |
| ENSG00000116690 | 1.628689435 | 5.619013608  | 1.15E-13    | 1.05E-11    | PRG4           | protein_coding                     | 4840   |

|                 |             |              |             |             |               |                |        |
|-----------------|-------------|--------------|-------------|-------------|---------------|----------------|--------|
| ENSG00000144810 | 1.621302496 | 8.28135144   | 5.61E-46    | 7.75E-43    | COL8A1        | protein_coding | 894.5  |
| ENSG00000166402 | 1.618703618 | 3.10568719   | 3.19E-29    | 1.57E-26    | TUB           | protein_coding | 2019   |
| ENSG00000130303 | 1.615429183 | 0.25236156   | 7.14E-06    | 0.000144198 | BST2          | protein_coding | 459    |
| ENSG00000049540 | 1.596370106 | 4.799776283  | 9.79E-28    | 4.14E-25    | ELN           | protein_coding | 733    |
| ENSG00000157554 | 1.596162878 | 0.391569289  | 3.92E-07    | 1.11E-05    | ERG           | protein_coding | 3259.5 |
| ENSG00000224389 | 1.595023061 | -0.691297071 | 0.000179948 | 0.002240857 | C4B           | protein_coding | 605.5  |
| ENSG00000104881 | 1.585184885 | 4.883425486  | 5.13E-26    | 1.73E-23    | PPP1R13L      | protein_coding | 648    |
| ENSG00000167244 | 1.584352668 | 1.018730987  | 7.84E-07    | 2.06E-05    | IGF2          | protein_coding | 1583   |
| ENSG00000183196 | 1.575691945 | 3.819886483  | 1.05E-27    | 4.35E-25    | CHST6         | protein_coding | 5025   |
| ENSG00000182575 | 1.569105704 | -1.572162588 | 0.002725879 | 0.019940032 | NXP3          | protein_coding | 2179   |
| ENSG00000104043 | 1.566561736 | -0.619346743 | 0.000129821 | 0.001716773 | ATP8B4        | protein_coding | 887    |
| ENSG00000107317 | 1.558403825 | -0.48750841  | 0.000203315 | 0.002462251 | PTGDS         | protein_coding | 661    |
| ENSG00000149970 | 1.558033283 | 1.112180293  | 3.70E-07    | 1.05E-05    | CNKSR2        | protein_coding | 4355   |
| ENSG00000115380 | 1.557348099 | 10.08293743  | 2.39E-57    | 5.50E-54    | EFEMP1        | protein_coding | 580    |
| ENSG00000159403 | 1.541401261 | 7.976939058  | 2.78E-22    | 6.62E-20    | C1R           | protein_coding | 614.5  |
| ENSG00000135917 | 1.541369814 | -0.637081027 | 0.000471001 | 0.004918324 | SLC19A3       | protein_coding | 707.5  |
| ENSG00000131471 | 1.53969952  | -0.52060375  | 0.004392925 | 0.028891192 | AOC3          | protein_coding | 2392   |
| ENSG00000091879 | 1.539644447 | 2.083141239  | 1.79E-09    | 8.66E-08    | ANGPT2        | protein_coding | 2799.5 |
| ENSG00000170381 | 1.538428793 | -1.5548506   | 0.008341423 | 0.046839079 | SEMA3E        | protein_coding | 1520   |
| ENSG00000106823 | 1.533058642 | 4.319073466  | 4.62E-07    | 1.28E-05    | ECM2          | protein_coding | 2127   |
| ENSG00000263176 | 1.530437272 | -1.590439982 | 0.006017371 | 0.036857066 | RP11-893F2.15 | lincRNA        | 578    |
| ENSG00000132003 | 1.528733376 | 2.967381455  | 8.64E-17    | 1.22E-14    | ZSWIM4        | protein_coding | 2921   |
| ENSG00000254343 | 1.513299535 | 1.539068235  | 5.16E-07    | 1.42E-05    | RP11-760H22.2 | lincRNA        | 506    |
| ENSG00000132821 | 1.511829058 | 0.957740105  | 1.35E-06    | 3.34E-05    | VSTM2L        | protein_coding | 831    |
| ENSG00000134508 | 1.511084496 | 3.677810624  | 1.96E-20    | 3.94E-18    | CABLES1       | protein_coding | 594    |
| ENSG00000105664 | 1.503929649 | 6.901654497  | 6.40E-11    | 3.88E-09    | COMP          | protein_coding | 2376.5 |
| ENSG00000237412 | 1.502432476 | -0.332458581 | 7.30E-05    | 0.001063367 | PRSS56        | protein_coding | 2157   |
| ENSG00000101670 | 1.499908448 | 3.380547193  | 2.11E-17    | 3.10E-15    | LIPG          | protein_coding | 1760   |
| ENSG00000282849 | 1.498328253 | 1.846031099  | 2.97E-12    | 2.23E-10    | RP11-121P12.1 | lincRNA        | 638    |
| ENSG00000102683 | 1.492358134 | 2.456316685  | 5.14E-13    | 4.34E-11    | SGCG          | protein_coding | 1624   |
| ENSG00000169116 | 1.492031161 | -1.630491707 | 0.0032739   | 0.022947272 | PARM1         | protein_coding | 4659.5 |
| ENSG00000144893 | 1.490713946 | -0.568218502 | 0.000419489 | 0.004487188 | MED12L        | protein_coding | 749    |
| ENSG00000111907 | 1.487198133 | 2.762894286  | 1.89E-12    | 1.45E-10    | TPD52L1       | protein_coding | 999    |
| ENSG00000071575 | 1.485869018 | 5.244292326  | 2.12E-15    | 2.60E-13    | TRIB2         | protein_coding | 1804   |
| ENSG00000185760 | 1.484627706 | 0.649296541  | 0.000259952 | 0.003036292 | KCNQ5         | protein_coding | 6236   |
| ENSG00000163431 | 1.483311041 | 4.832192179  | 1.96E-10    | 1.09E-08    | LMOD1         | protein_coding | 3514   |
| ENSG00000133321 | 1.482682523 | 0.906200764  | 3.99E-07    | 1.13E-05    | RARRES3       | protein_coding | 696    |
| ENSG00000127329 | 1.478226824 | 3.599385353  | 1.19E-06    | 2.97E-05    | PTPRB         | protein_coding | 5291   |
| ENSG00000168685 | 1.477424435 | 2.776465716  | 3.26E-09    | 1.49E-07    | IL7R          | protein_coding | 619    |
| ENSG00000175745 | 1.472426211 | 3.77774475   | 7.37E-27    | 2.68E-24    | NR2F1         | protein_coding | 796    |
| ENSG00000138771 | 1.471371419 | 4.01297694   | 3.99E-19    | 7.03E-17    | SHROOM3       | protein_coding | 619.5  |
| ENSG00000174348 | 1.469541011 | 6.162613356  | 2.16E-23    | 5.80E-21    | PODN          | protein_coding | 2744   |
| ENSG00000022267 | 1.467023463 | 5.606739531  | 2.81E-30    | 1.53E-27    | FHL1          | protein_coding | 796    |
| ENSG00000136153 | 1.463081677 | 7.375773964  | 3.90E-25    | 1.19E-22    | LMO7          | protein_coding | 914    |
| ENSG00000110900 | 1.448609669 | 0.210994795  | 3.40E-05    | 0.000554018 | TSPAN11       | protein_coding | 1353.5 |
| ENSG00000111452 | 1.447245099 | 2.482490044  | 1.50E-10    | 8.54E-09    | ADGRD1        | protein_coding | 726.5  |
| ENSG00000088882 | 1.446252714 | 3.554764124  | 1.96E-11    | 1.28E-09    | CPXM1         | protein_coding | 2391   |
| ENSG00000187678 | 1.445506563 | 3.092872499  | 6.64E-11    | 4.01E-09    | SPRY4         | protein_coding | 575    |
| ENSG00000179841 | 1.442003992 | 1.227370137  | 4.75E-06    | 0.000101101 | AKAP5         | protein_coding | 4544   |
| ENSG00000150907 | 1.441853267 | 1.173353543  | 1.05E-08    | 4.28E-07    | FOXO1         | protein_coding | 1773   |
| ENSG00000166278 | 1.436484571 | 1.021837619  | 1.61E-07    | 5.02E-06    | C2            | protein_coding | 1609   |
| ENSG00000118513 | 1.434253559 | -0.31736746  | 0.00847792  | 0.047323244 | MYB           | protein_coding | 2478.5 |
| ENSG00000132182 | 1.43269086  | -1.11678884  | 0.003672154 | 0.025064809 | NUP210        | protein_coding | 2223   |
| ENSG00000182326 | 1.430056875 | 8.661997581  | 3.95E-24    | 1.14E-21    | C1S           | protein_coding | 667    |
| ENSG00000182752 | 1.428186528 | 5.656599164  | 2.14E-22    | 5.29E-20    | PAPPA         | protein_coding | 790    |
| ENSG00000124302 | 1.416759847 | 0.510467651  | 3.76E-06    | 8.19E-05    | CHST8         | protein_coding | 2133   |
| ENSG00000100336 | 1.41560207  | 0.785756893  | 8.96E-09    | 3.69E-07    | APOL4         | protein_coding | 844.5  |
| ENSG00000259450 | 1.410773261 | 0.140061729  | 0.00032719  | 0.003668532 | RP11-265N7.1  | lincRNA        | 1961   |
| ENSG00000153012 | 1.401891896 | 2.267228266  | 4.87E-10    | 2.54E-08    | LG12          | protein_coding | 3597.5 |
| ENSG00000127472 | 1.398680621 | -1.129339963 | 0.005424371 | 0.034112753 | PLA2G5        | protein_coding | 1028   |
| ENSG00000184347 | 1.397986202 | 8.074487476  | 1.62E-17    | 2.42E-15    | SLIT3         | protein_coding | 3159   |
| ENSG00000185885 | 1.396321819 | 4.531010865  | 3.92E-24    | 1.14E-21    | IFITM1        | protein_coding | 787    |
| ENSG00000262655 | 1.395510858 | 4.68766779   | 4.64E-28    | 2.04E-25    | SPON1         | protein_coding | 2921   |
| ENSG00000091129 | 1.38891039  | 2.404032235  | 3.67E-12    | 2.74E-10    | NRCAM         | protein_coding | 1594   |
| ENSG00000101115 | 1.386532016 | -0.178463224 | 0.000698443 | 0.006748167 | SALL4         | protein_coding | 1151   |
| ENSG00000151090 | 1.385592682 | 2.707279781  | 2.16E-13    | 1.90E-11    | THRB          | protein_coding | 728.5  |
| ENSG00000101938 | 1.382347417 | 4.202336076  | 2.15E-15    | 2.62E-13    | CHRD1         | protein_coding | 1934   |
| ENSG00000178882 | 1.382313697 | -0.995741298 | 0.007800191 | 0.044672055 | FAM101A       | protein_coding | 2148   |
| ENSG00000198108 | 1.380304334 | 3.315751168  | 5.22E-14    | 5.10E-12    | CHSY3         | protein_coding | 2243   |
| ENSG00000113212 | 1.379269665 | 0.227109427  | 4.99E-06    | 0.00010549  | PCDHB7        | protein_coding | 3765   |
| ENSG00000185565 | 1.376456895 | 3.646420633  | 8.02E-15    | 9.03E-13    | LSAMP         | protein_coding | 772    |
| ENSG00000154864 | 1.375060982 | 3.077535095  | 5.65E-09    | 2.46E-07    | PIEZO2        | protein_coding | 1846   |
| ENSG00000175426 | 1.367789357 | -0.586343867 | 5.98E-05    | 0.000896785 | PCSK1         | protein_coding | 1857.5 |
| ENSG00000165124 | 1.361757049 | 3.721506749  | 7.76E-17    | 1.11E-14    | SVEP1         | protein_coding | 5124   |
| ENSG00000143333 | 1.3563282   | -0.325111091 | 0.004730502 | 0.030671245 | RGS16         | protein_coding | 2427   |
| ENSG00000184371 | 1.355089747 | 5.979666414  | 4.95E-37    | 4.27E-34    | CSF1          | protein_coding | 1009   |
| ENSG00000100342 | 1.354020813 | 5.591762324  | 1.54E-15    | 1.94E-13    | APOL1         | protein_coding | 612    |
| ENSG00000156466 | 1.349920377 | 5.337234059  | 2.43E-06    | 5.65E-05    | GDF6          | protein_coding | 1179   |
| ENSG00000164530 | 1.347100591 | 5.952320999  | 7.46E-22    | 1.74E-19    | PI16          | protein_coding | 2083   |
| ENSG00000047936 | 1.346982678 | 0.500505903  | 1.75E-05    | 0.000311542 | ROS1          | protein_coding | 7417   |

|                 |             |              |             |             |                    |                      |        |
|-----------------|-------------|--------------|-------------|-------------|--------------------|----------------------|--------|
| ENSG00000103522 | 1.34546689  | 0.994545495  | 2.08E-05    | 0.00035943  | IL21R              | protein_coding       | 2953   |
| ENSG00000162551 | 1.341755952 | 6.569286129  | 1.91E-42    | 2.19E-39    | ALPL               | protein_coding       | 2131   |
| ENSG00000223764 | 1.339973202 | 2.021589743  | 0.001533768 | 0.012730581 | RP11-5407.3        | lincRNA              | 1389   |
| ENSG00000147234 | 1.337001403 | -0.005927793 | 2.51E-06    | 5.81E-05    | FRMPD3             | protein_coding       | 7155   |
| ENSG00000109063 | 1.33293937  | 0.839801744  | 5.50E-05    | 0.000835608 | MYH3               | protein_coding       | 583    |
| ENSG00000099864 | 1.332790187 | 1.836267278  | 8.14E-07    | 2.12E-05    | PALM               | protein_coding       | 2137   |
| ENSG00000267041 | 1.331799972 | 0.64682875   | 0.000138385 | 0.001814951 | ZNF850             | protein_coding       | 7625   |
| ENSG00000149633 | 1.327164905 | 2.949756411  | 4.30E-11    | 2.66E-09    | KIAA1755           | protein_coding       | 2349   |
| ENSG00000137809 | 1.326354381 | 8.411988027  | 4.93E-24    | 1.38E-21    | ITGA11             | protein_coding       | 670    |
| ENSG00000162804 | 1.320767828 | 4.726025107  | 2.62E-14    | 2.70E-12    | SNED1              | protein_coding       | 1446.5 |
| ENSG00000125414 | 1.314660248 | 0.394927353  | 0.00023075  | 0.002740021 | MYH2               | protein_coding       | 2453.5 |
| ENSG00000064042 | 1.310439345 | -0.336216074 | 0.000464331 | 0.004858932 | LIMCH1             | protein_coding       | 3456.5 |
| ENSG00000118523 | 1.299920041 | 9.630004256  | 5.88E-19    | 1.02E-16    | CTGF               | protein_coding       | 2339   |
| ENSG00000117525 | 1.297647941 | 5.444039883  | 8.72E-31    | 5.16E-28    | F3                 | protein_coding       | 1536   |
| ENSG00000171223 | 1.289410551 | 5.974929825  | 6.72E-26    | 2.21E-23    | JUNB               | protein_coding       | 1820   |
| ENSG00000158079 | 1.284736405 | 3.81767423   | 6.34E-23    | 1.66E-20    | PTPDC1             | protein_coding       | 4417.5 |
| ENSG00000119630 | 1.276313019 | 0.927890221  | 1.20E-05    | 0.000223796 | PGF                | protein_coding       | 1409   |
| ENSG00000119280 | 1.275731126 | 7.128168606  | 5.90E-33    | 4.07E-30    | C1orf198           | protein_coding       | 1041   |
| ENSG00000115419 | 1.274480028 | 8.615184104  | 5.29E-16    | 6.89E-14    | GLS                | protein_coding       | 693    |
| ENSG00000184635 | 1.273452164 | 3.592116075  | 6.81E-17    | 9.79E-15    | ZNF93              | protein_coding       | 590    |
| ENSG00000101680 | 1.270226042 | 6.548511787  | 2.23E-27    | 8.89E-25    | LAMA1              | protein_coding       | 2565.5 |
| ENSG00000117152 | 1.269359692 | 5.041019573  | 4.98E-29    | 2.40E-26    | RGS4               | protein_coding       | 873.5  |
| ENSG00000107957 | 1.269128166 | 9.053269131  | 2.31E-29    | 1.17E-26    | SH3PXD2A           | protein_coding       | 8374.5 |
| ENSG00000183598 | 1.269070304 | -0.708789479 | 0.001062108 | 0.009488864 | HIST2H3D           | protein_coding       | 4123   |
| ENSG00000248187 | 1.265531115 | 2.225267139  | 3.91E-06    | 8.50E-05    | RP11-184M15.1      | lincRNA              | 661    |
| ENSG00000105088 | 1.261029553 | 0.071147427  | 0.000119872 | 0.00160988  | OLFM2              | protein_coding       | 1226   |
| ENSG00000184304 | 1.255965328 | 4.994259743  | 5.18E-26    | 1.73E-23    | PRKD1              | protein_coding       | 585    |
| ENSG00000277758 | 1.253935891 | 0.870496349  | 5.38E-05    | 0.000822211 | ABC7-42404400C24.1 | protein_coding       | 1370   |
| ENSG00000156140 | 1.253809246 | 1.504752377  | 3.23E-06    | 7.21E-05    | ADAMTS3            | protein_coding       | 2740.5 |
| ENSG00000126803 | 1.252719354 | 1.789408064  | 1.39E-06    | 3.41E-05    | HSPA2              | protein_coding       | 2767   |
| ENSG00000162614 | 1.250766173 | 6.29725958   | 2.75E-20    | 5.43E-18    | NEXN               | protein_coding       | 1714   |
| ENSG00000227992 | 1.250447755 | 0.647571844  | 0.00044555  | 0.004702797 | AC108463.2         | processed_pseudogene | 347    |
| ENSG00000169418 | 1.24977598  | -0.711409747 | 0.005413298 | 0.034094683 | NPR1               | protein_coding       | 1706   |
| ENSG00000198028 | 1.245143216 | -0.182106355 | 0.00096281  | 0.008778199 | ZNF560             | protein_coding       | 1585   |
| ENSG00000151414 | 1.240824388 | 9.398866572  | 1.27E-15    | 1.61E-13    | NEK7               | protein_coding       | 586.5  |
| ENSG00000223953 | 1.238715629 | 0.633402797  | 2.14E-05    | 0.000369118 | C1QTNF5            | protein_coding       | 814.5  |
| ENSG00000109762 | 1.237477747 | 5.708599928  | 1.07E-26    | 3.82E-24    | SNX25              | protein_coding       | 1937   |
| ENSG00000137124 | 1.235405194 | 6.800144057  | 1.36E-05    | 0.000250319 | ALDH1B1            | protein_coding       | 1825   |
| ENSG00000182118 | 1.233498039 | 1.950860756  | 0.000578664 | 0.005791955 | FAM89A             | protein_coding       | 1239   |
| ENSG00000197442 | 1.231381028 | 0.671999192  | 0.005423276 | 0.034112753 | MAP3K5             | protein_coding       | 2781   |
| ENSG00000279118 | 1.231314397 | 3.015367821  | 4.59E-12    | 3.37E-10    | RP11-517I3.2       | TEC                  | 2326   |
| ENSG00000124225 | 1.230897517 | 3.421650317  | 2.97E-06    | 6.71E-05    | PMEPA1             | protein_coding       | 2689   |
| ENSG00000060718 | 1.223952571 | 8.694449967  | 9.20E-20    | 1.73E-17    | COL11A1            | protein_coding       | 1709   |
| ENSG00000151418 | 1.222284871 | -0.909095852 | 0.004817602 | 0.031109192 | ATP6V1G3           | protein_coding       | 620.5  |
| ENSG00000163661 | 1.220015337 | 8.873479369  | 9.00E-23    | 2.30E-20    | PTX3               | protein_coding       | 1940   |
| ENSG00000147408 | 1.216741823 | 1.678024809  | 1.50E-07    | 4.70E-06    | CSGALNACT1         | protein_coding       | 706    |
| ENSG00000226608 | 1.212033505 | -0.500890576 | 0.001060326 | 0.00947704  | FTLP3              | processed_pseudogene | 528    |
| ENSG00000128422 | 1.208985843 | -0.170510744 | 0.000250473 | 0.002933848 | KRT17              | protein_coding       | 697    |
| ENSG0000028137  | 1.205618889 | -0.475719146 | 0.003726517 | 0.025352314 | TNFRSF1B           | protein_coding       | 557    |
| ENSG00000250899 | 1.205266431 | 2.033440635  | 0.004900073 | 0.031470457 | RP11-253E3.3       | lincRNA              | 3514   |
| ENSG00000145681 | 1.204456003 | 4.24932646   | 3.93E-19    | 7.03E-17    | HAPLN1             | protein_coding       | 823    |
| ENSG00000127399 | 1.203263179 | -0.135075976 | 0.00159329  | 0.013098631 | LRR61              | protein_coding       | 1456   |
| ENSG00000055813 | 1.200084785 | 3.112085321  | 2.18E-13    | 1.91E-11    | CCDC85A            | protein_coding       | 3982   |
| ENSG0000021645  | 1.199224581 | 2.347787695  | 3.57E-08    | 1.28E-06    | NRXN3              | protein_coding       | 2750.5 |
| ENSG00000239617 | 1.196773483 | -1.360628885 | 0.006946476 | 0.041052758 | RP11-302B13.1      | processed_pseudogene | 396    |
| ENSG00000113578 | 1.195003947 | 4.342285795  | 2.10E-07    | 6.39E-06    | FGF1               | protein_coding       | 975    |
| ENSG00000169330 | 1.193648019 | 2.345917601  | 3.53E-13    | 3.04E-11    | KIAA1024           | protein_coding       | 6180.5 |
| ENSG00000189001 | 1.186699045 | 2.899051123  | 4.83E-11    | 2.96E-09    | SBSN               | protein_coding       | 957    |
| ENSG00000071282 | 1.18550995  | 6.731347024  | 2.78E-09    | 1.30E-07    | LMCD1              | protein_coding       | 1113   |
| ENSG00000204389 | 1.182244361 | 4.027117595  | 2.70E-12    | 2.04E-10    | HSPA1A             | protein_coding       | 2196   |
| ENSG00000099860 | 1.180729644 | 5.405514874  | 6.36E-15    | 7.28E-13    | GADD45B            | protein_coding       | 750    |
| ENSG00000126804 | 1.179868327 | 5.66821387   | 2.95E-31    | 1.91E-28    | ZBTB1              | protein_coding       | 605.5  |
| ENSG00000180139 | 1.179314942 | 1.312831505  | 9.63E-08    | 3.12E-06    | ACTA2-AS1          | antisense            | 810.5  |
| ENSG00000159216 | 1.17785654  | 7.053257422  | 3.66E-20    | 7.15E-18    | RUNX1              | protein_coding       | 1582   |
| ENSG00000135919 | 1.177537136 | 8.525630307  | 1.19E-30    | 6.64E-28    | SERPINE2           | protein_coding       | 1352   |
| ENSG00000166741 | 1.175951739 | 8.235942632  | 1.19E-05    | 0.000221664 | NNMT               | protein_coding       | 590    |
| ENSG00000184500 | 1.174615173 | 4.893975688  | 1.59E-21    | 3.43E-19    | PROS1              | protein_coding       | 806    |
| ENSG00000070495 | 1.174143928 | 4.583602092  | 3.16E-09    | 1.45E-07    | JMJD6              | protein_coding       | 1748   |
| ENSG00000227496 | 1.171425347 | -1.135029236 | 0.008086392 | 0.045749972 | RP11-145A3.1       | antisense            | 1530   |
| ENSG00000154175 | 1.169774466 | 8.69020915   | 4.07E-14    | 4.09E-12    | ABI3BP             | protein_coding       | 566    |
| ENSG00000133110 | 1.169193106 | 12.73064478  | 1.01E-21    | 2.28E-19    | POSTN              | protein_coding       | 3092   |
| ENSG00000064932 | 1.16775036  | 6.037295152  | 6.50E-27    | 2.40E-24    | SBN02              | protein_coding       | 1061.5 |
| ENSG00000272674 | 1.165605712 | -0.140128749 | 0.000523267 | 0.005335468 | PCDHB16            | protein_coding       | 2947.5 |
| ENSG00000142089 | 1.164353048 | 8.251067111  | 3.31E-28    | 1.49E-25    | IFITM3             | protein_coding       | 628    |
| ENSG00000163520 | 1.162180836 | 8.922339597  | 2.56E-22    | 6.25E-20    | FBLN2              | protein_coding       | 584    |
| ENSG00000148344 | 1.157685783 | 3.891368796  | 9.71E-17    | 1.35E-14    | PTGES              | protein_coding       | 1821   |
| ENSG00000158258 | 1.15612227  | 2.219448431  | 3.40E-05    | 0.000553784 | CLSTN2             | protein_coding       | 8303.5 |
| ENSG00000244242 | 1.152672627 | -0.599387898 | 0.003243374 | 0.02277621  | IFITM10            | protein_coding       | 2634.5 |
| ENSG00000111057 | 1.151644065 | 5.692460859  | 4.01E-05    | 0.000639339 | KRT18              | protein_coding       | 1420   |
| ENSG00000254810 | 1.151332207 | -0.272895903 | 0.001251933 | 0.010879679 | RP11-672A2.4       | lincRNA              | 651    |

|                 |              |              |             |             |               |                                    |        |
|-----------------|--------------|--------------|-------------|-------------|---------------|------------------------------------|--------|
| ENSG00000150687 | 1.150074271  | 9.476630118  | 5.03E-17    | 7.28E-15    | PRSS23        | protein_coding                     | 907    |
| ENSG00000184258 | 1.149823069  | 1.135797587  | 1.75E-07    | 5.39E-06    | CDR1          | protein_coding                     | 2467   |
| ENSG00000175697 | 1.140999889  | -0.238157718 | 0.000192226 | 0.002352722 | GPR156        | protein_coding                     | 4154   |
| ENSG00000151276 | 1.135707165  | 5.146053453  | 8.25E-14    | 7.66E-12    | MAG11         | protein_coding                     | 2646   |
| ENSG00000133083 | 1.135470459  | 3.104329369  | 1.26E-11    | 8.44E-10    | DCLK1         | protein_coding                     | 4929.5 |
| ENSG00000170962 | 1.128979762  | 5.642890738  | 9.49E-09    | 3.89E-07    | PDGFD         | protein_coding                     | 3801   |
| ENSG00000157551 | 1.128228548  | 2.012254531  | 0.00339698  | 0.023614657 | KCNJ15        | protein_coding                     | 715    |
| ENSG00000185686 | 1.127317743  | -0.719914405 | 0.006212364 | 0.037783215 | PRAME         | protein_coding                     | 815.5  |
| ENSG00000138669 | 1.122697622  | -0.33393802  | 0.004840269 | 0.031197366 | PRKG2         | protein_coding                     | 2623   |
| ENSG00000237807 | 1.119759387  | 1.12474012   | 3.93E-06    | 8.53E-05    | RP11-400K9.4  | lincRNA                            | 2387   |
| ENSG00000117069 | 1.116018232  | 1.372209159  | 1.02E-05    | 0.000195804 | ST6GALNAC5    | protein_coding                     | 787    |
| ENSG00000153885 | 1.114459081  | 6.03372999   | 6.75E-08    | 2.29E-06    | KCTD15        | protein_coding                     | 649    |
| ENSG00000120324 | 1.114187417  | -0.499078282 | 0.005448063 | 0.034217335 | PCDHB10       | protein_coding                     | 3290   |
| ENSG00000101463 | 1.111218098  | 2.387724739  | 3.68E-06    | 8.05E-05    | SYNDIG1       | protein_coding                     | 1469.5 |
| ENSG00000137959 | 1.109145352  | 3.094759881  | 1.20E-06    | 3.00E-05    | IFI44L        | protein_coding                     | 869.5  |
| ENSG00000170345 | 1.108716086  | 2.755228929  | 1.36E-06    | 3.36E-05    | FOS           | protein_coding                     | 815    |
| ENSG00000107821 | 1.1058806    | 3.529785052  | 1.48E-14    | 1.60E-12    | KAZALD1       | protein_coding                     | 925    |
| ENSG00000169174 | 1.10470094   | 4.12293994   | 4.40E-13    | 3.74E-11    | PCSK9         | protein_coding                     | 3764   |
| ENSG00000183578 | 1.10348856   | 2.548439344  | 0.003241963 | 0.022774021 | TNFAIP8L3     | protein_coding                     | 2132   |
| ENSG00000182389 | 1.100823666  | 2.355265698  | 1.13E-09    | 5.63E-08    | CACNB4        | protein_coding                     | 3182.5 |
| ENSG00000153162 | 1.096028322  | 1.058706626  | 1.08E-05    | 0.000205242 | BMP6          | protein_coding                     | 2780   |
| ENSG00000177694 | 1.09204164   | 3.489167544  | 3.11E-14    | 3.16E-12    | NAALADL2      | protein_coding                     | 789.5  |
| ENSG00000251085 | 1.084943698  | -0.549185355 | 0.008420866 | 0.047131813 | RP11-893F2.6  | lincRNA                            | 455    |
| ENSG00000204941 | 1.080949772  | 2.97089614   | 1.07E-11    | 7.31E-10    | PSG5          | protein_coding                     | 1064   |
| ENSG00000232325 | 1.080932588  | 0.919565528  | 3.76E-06    | 8.19E-05    | AC007743.1    | antisense                          | 1657   |
| ENSG00000260604 | 1.079022532  | 2.845126599  | 8.93E-09    | 3.68E-07    | RP1-140K8.5   | lincRNA                            | 7060   |
| ENSG00000175084 | 1.078858613  | 1.095612654  | 9.71E-06    | 0.00018781  | DES           | protein_coding                     | 733    |
| ENSG00000121898 | 1.073996985  | -0.205388435 | 0.002307903 | 0.017553736 | CPXM2         | protein_coding                     | 2580   |
| ENSG00000183801 | 1.073065123  | 3.680320282  | 6.19E-07    | 1.66E-05    | OLFML1        | protein_coding                     | 1438   |
| ENSG00000109339 | 1.070897413  | 0.021967306  | 0.001319866 | 0.011351959 | MAPK10        | protein_coding                     | 595    |
| ENSG00000250548 | 1.068592746  | 0.01664253   | 0.000540929 | 0.005475122 | RP11-47122.2  | lincRNA                            | 2786.5 |
| ENSG00000142871 | 1.06418836   | 9.420096291  | 0.000626446 | 0.006157126 | CYR61         | protein_coding                     | 1420.5 |
| ENSG00000139304 | 1.063834072  | 1.364456804  | 7.76E-05    | 0.001120002 | PTPRQ         | protein_coding                     | 1087.5 |
| ENSG00000205710 | 1.060426028  | 2.06638305   | 8.89E-07    | 2.30E-05    | C17orf107     | protein_coding                     | 2237   |
| ENSG0000054967  | 1.058813486  | 1.952325125  | 9.59E-05    | 0.001332226 | RELT          | protein_coding                     | 2669   |
| ENSG00000171872 | 1.058599544  | -0.090648225 | 0.003015468 | 0.021570751 | KLF17         | protein_coding                     | 1913   |
| ENSG00000112972 | 1.058420633  | 7.051063965  | 1.14E-28    | 5.35E-26    | HMGCS1        | protein_coding                     | 708    |
| ENSG00000126562 | 1.056592968  | 4.647030446  | 4.77E-07    | 1.32E-05    | WNK4          | protein_coding                     | 1099.5 |
| ENSG00000280143 | 1.051679959  | 3.770145861  | 2.78E-06    | 6.35E-05    | AP000892.6    | TEC                                | 5326   |
| ENSG00000111799 | 1.051303567  | 11.29421877  | 2.56E-18    | 4.10E-16    | COL12A1       | protein_coding                     | 3135   |
| ENSG00000164112 | 1.049279508  | -0.196237634 | 0.004892589 | 0.031446503 | TMEM155       | protein_coding                     | 1377.5 |
| ENSG00000068078 | 1.048832775  | -0.308176146 | 0.001628366 | 0.013318261 | FGFR3         | protein_coding                     | 4041.5 |
| ENSG00000101825 | 1.048311954  | 9.123279287  | 1.48E-25    | 4.64E-23    | MXRA5         | protein_coding                     | 9793   |
| ENSG00000256894 | 1.047315654  | 0.239955919  | 0.000459304 | 0.004828163 | RP11-283G6.3  | antisense                          | 501    |
| ENSG00000148655 | 1.046306882  | 0.874817227  | 2.68E-05    | 0.00044893  | C10orf11      | protein_coding                     | 373    |
| ENSG00000064547 | 1.045192822  | 0.379329336  | 0.006141037 | 0.037437365 | LPAR2         | protein_coding                     | 595    |
| ENSG00000178187 | 1.04155497   | -0.304306434 | 0.006537996 | 0.03925641  | ZNF454        | protein_coding                     | 2142   |
| ENSG00000188766 | 1.041279635  | 2.53491548   | 1.10E-05    | 0.000208554 | SPRED3        | protein_coding                     | 646    |
| ENSG00000176697 | 1.04032189   | 3.618293158  | 1.44E-06    | 3.51E-05    | BDNF          | protein_coding                     | 4030   |
| ENSG00000165757 | 1.039436826  | 7.459796388  | 3.53E-13    | 3.04E-11    | KIAA1462      | protein_coding                     | 684    |
| ENSG00000140743 | 1.033413263  | 5.59559517   | 2.77E-22    | 6.62E-20    | CDR2          | protein_coding                     | 711    |
| ENSG00000140092 | 1.028245575  | 7.818086559  | 1.27E-22    | 3.20E-20    | FBLN5         | protein_coding                     | 900    |
| ENSG00000122335 | 1.024889922  | 5.293303881  | 3.59E-13    | 3.07E-11    | SERAC1        | protein_coding                     | 2284   |
| ENSG00000179348 | 1.023113723  | 1.789561908  | 0.00031517  | 0.003568534 | GATA2         | protein_coding                     | 1655.5 |
| ENSG00000134802 | 1.019770182  | 4.154350521  | 4.24E-10    | 2.24E-08    | SLC43A3       | protein_coding                     | 588    |
| ENSG00000231760 | 1.018464862  | -0.425155623 | 0.003055128 | 0.021786723 | RP11-350J20.5 | antisense                          | 882    |
| ENSG00000108960 | 1.017741733  | 2.788665166  | 3.31E-06    | 7.36E-05    | MMD           | protein_coding                     | 670    |
| ENSG00000143162 | 1.0152292    | 5.317869672  | 1.57E-21    | 3.42E-19    | CREG1         | protein_coding                     | 1384   |
| ENSG00000095951 | 1.009772335  | 5.096169272  | 4.33E-16    | 5.68E-14    | HIVEP1        | protein_coding                     | 1602   |
| ENSG00000132465 | 1.007996039  | 1.71448112   | 7.34E-05    | 0.001066652 | JCHAIN        | protein_coding                     | 586.5  |
| ENSG00000260196 | 1.005319398  | 0.584747004  | 0.001797234 | 0.014470808 | RP1-239B22.5  | antisense                          | 2883   |
| ENSG00000151014 | 1.005151647  | 3.446607551  | 3.98E-06    | 8.62E-05    | NOCT          | protein_coding                     | 1572   |
| ENSG00000136383 | 1.003443201  | 1.312731398  | 0.001242363 | 0.010802079 | ALPK3         | protein_coding                     | 5702   |
| ENSG00000066248 | -1.000709336 | 0.439293707  | 0.000652644 | 0.006360287 | NGEF          | protein_coding                     | 590    |
| ENSG00000136274 | -1.001723004 | 1.683574405  | 2.27E-06    | 5.35E-05    | NACAD         | protein_coding                     | 2554   |
| ENSG00000164010 | -1.002579094 | 3.914739168  | 0.0001267   | 0.001684101 | ERMAP         | protein_coding                     | 3369   |
| ENSG00000177406 | -1.003690409 | 2.223251896  | 2.23E-05    | 0.000381703 | RP11-218M22.1 | antisense                          | 2194   |
| ENSG00000176826 | -1.003955542 | 2.672297973  | 0.000202171 | 0.00245126  | FKBP9P1       | transcribed_unprocessed_pseudogene | 1971   |
| ENSG00000250510 | -1.004287996 | 0.567601778  | 0.005165067 | 0.032820915 | GPR162        | protein_coding                     | 1150   |
| ENSG00000261327 | -1.006282546 | 1.114556887  | 0.000139567 | 0.001825838 | RP11-863P13.3 | lincRNA                            | 1034.5 |
| ENSG00000240050 | -1.007464398 | -0.035351161 | 0.003083563 | 0.021949388 | RP1-93H18.1   | lincRNA                            | 1055   |
| ENSG00000166321 | -1.008106452 | 0.721056373  | 0.00355211  | 0.024406319 | NUDT13        | protein_coding                     | 2010.5 |
| ENSG00000182621 | -1.008293158 | 2.59303357   | 2.81E-10    | 1.54E-08    | PLCB1         | protein_coding                     | 2055   |
| ENSG00000161267 | -1.011310271 | 0.859748311  | 0.000163739 | 0.002076463 | BDH1          | protein_coding                     | 680    |
| ENSG00000158813 | -1.011859632 | -0.132189834 | 0.007272754 | 0.042354181 | EDA           | protein_coding                     | 1167   |
| ENSG00000106948 | -1.015374572 | 4.67406341   | 0.003725343 | 0.025352314 | AKNA          | protein_coding                     | 3894   |
| ENSG00000153234 | -1.01616925  | 0.383568784  | 0.000529111 | 0.005382985 | NR4A2         | protein_coding                     | 2000   |
| ENSG00000167065 | -1.020872408 | 2.721290177  | 9.50E-12    | 6.56E-10    | DUSP18        | protein_coding                     | 1231.5 |
| ENSG00000131019 | -1.020995289 | 1.004393944  | 0.000106446 | 0.001463744 | ULBP3         | protein_coding                     | 861.5  |
| ENSG00000144730 | -1.021535121 | 2.084304702  | 2.97E-07    | 8.73E-06    | IL17RD        | protein_coding                     | 2167   |

|                 |              |              |             |             |                |                                    |        |
|-----------------|--------------|--------------|-------------|-------------|----------------|------------------------------------|--------|
| ENSG00000234814 | -1.024862327 | 1.136019943  | 0.00017565  | 0.002195248 | SVILP1         | transcribed_unprocessed_pseudogene | 525    |
| ENSG00000183762 | -1.025560218 | 3.724385574  | 7.97E-14    | 7.43E-12    | KREMEN1        | protein_coding                     | 997    |
| ENSG00000187796 | -1.026701215 | 0.842945625  | 0.00117877  | 0.010340146 | CARD9          | protein_coding                     | 1912   |
| ENSG00000257815 | -1.027606617 | 0.007107253  | 0.001479051 | 0.012380628 | LINC01481      | antisense                          | 512.5  |
| ENSG00000091409 | -1.02887334  | 2.066020366  | 3.51E-06    | 7.74E-05    | ITGA6          | protein_coding                     | 970    |
| ENSG00000262049 | -1.03088375  | 0.225051169  | 0.001450298 | 0.012199117 | RP13-103211.7  | antisense                          | 1977   |
| ENSG00000132718 | -1.033128142 | 5.207907069  | 1.15E-18    | 1.94E-16    | SYT11          | protein_coding                     | 5240   |
| ENSG00000072818 | -1.035843874 | 0.524373138  | 0.004251068 | 0.028180333 | ACAP1          | protein_coding                     | 603.5  |
| ENSG00000010438 | -1.03593902  | 0.074100352  | 0.002494855 | 0.01864524  | PRSS3          | protein_coding                     | 704.5  |
| ENSG00000159214 | -1.036723308 | 1.063894045  | 0.001407046 | 0.011942018 | CCDC24         | protein_coding                     | 860    |
| ENSG00000140939 | -1.037345321 | 1.904536911  | 0.000250345 | 0.002933848 | NOL3           | protein_coding                     | 677    |
| ENSG00000255857 | -1.039000306 | 0.512543066  | 6.19E-05    | 0.000920065 | PXN-AS1        | antisense                          | 767    |
| ENSG00000168781 | -1.039797441 | 2.067928512  | 3.96E-06    | 8.57E-05    | PPIP5K1        | protein_coding                     | 777    |
| ENSG00000137133 | -1.040765412 | 3.079977742  | 3.48E-13    | 3.01E-11    | HINT2          | protein_coding                     | 717    |
| ENSG00000221887 | -1.04114537  | -0.281352179 | 0.004466692 | 0.02928165  | HMSD           | protein_coding                     | 612.5  |
| ENSG00000248587 | -1.041920837 | 0.574306942  | 0.000289181 | 0.003312844 | GDNF-AS1       | antisense                          | 1941   |
| ENSG00000259353 | -1.042072324 | -0.62272832  | 0.006963461 | 0.041096127 | RP11-30K9.5    | antisense                          | 450    |
| ENSG00000187860 | -1.042374869 | 0.372450843  | 0.006778466 | 0.040296932 | CCDC157        | protein_coding                     | 1759   |
| ENSG00000247400 | -1.043183438 | 0.026197206  | 0.001000698 | 0.009073965 | DNAJC3-AS1     | lincRNA                            | 1654.5 |
| ENSG00000137727 | -1.045630454 | 3.724748946  | 3.18E-07    | 9.22E-06    | ARHGAP20       | protein_coding                     | 6032   |
| ENSG00000185215 | -1.045655904 | 4.447106379  | 2.35E-06    | 5.51E-05    | TNFAIP2        | protein_coding                     | 1334   |
| ENSG00000259721 | -1.046564234 | 2.288838937  | 1.09E-10    | 6.32E-09    | RP11-758N13.1  | lincRNA                            | 1156   |
| ENSG00000247373 | -1.046622972 | 0.295633198  | 0.006279283 | 0.038111863 | RP11-486O12.2  | lincRNA                            | 8279   |
| ENSG00000163945 | -1.047426104 | 2.793128937  | 0.004169157 | 0.027779622 | UVSSA          | protein_coding                     | 2132.5 |
| ENSG00000163888 | -1.052647639 | -0.275402534 | 0.001887618 | 0.015013594 | CAMK2N2        | protein_coding                     | 1362   |
| ENSG00000272398 | -1.053726445 | 0.785315781  | 0.002032011 | 0.015914127 | CD24           | protein_coding                     | 813.5  |
| ENSG00000237399 | -1.056494972 | -0.167510284 | 0.004011042 | 0.026881769 | PITRM1-AS1     | antisense                          | 601    |
| ENSG00000271646 | -1.057390331 | 0.162528855  | 0.00224224  | 0.017172539 | RP11-326I11.3  | lincRNA                            | 2503   |
| ENSG00000271614 | -1.058122792 | 0.320206538  | 0.000398044 | 0.004289553 | LINC00936      | lincRNA                            | 3632   |
| ENSG00000166292 | -1.059706438 | 1.54716832   | 8.78E-08    | 2.90E-06    | TMEM100        | protein_coding                     | 645    |
| ENSG00000065060 | -1.062738075 | 4.921475424  | 7.66E-12    | 5.42E-10    | UHRF1BP1       | protein_coding                     | 7138   |
| ENSG00000181218 | -1.065256575 | 0.39634884   | 0.00083208  | 0.007811218 | HIST3H2A       | protein_coding                     | 895    |
| ENSG00000134574 | -1.065257576 | 4.43331671   | 1.16E-08    | 4.69E-07    | DDB2           | protein_coding                     | 928.5  |
| ENSG00000104883 | -1.065572192 | 0.671841072  | 0.008059392 | 0.045701517 | PEX11G         | protein_coding                     | 949    |
| ENSG00000159261 | -1.066108273 | 0.271673714  | 0.007528446 | 0.043452225 | CLDN14         | protein_coding                     | 1391.5 |
| ENSG00000162999 | -1.067420504 | 1.586789024  | 0.003130439 | 0.022201463 | DUSP19         | protein_coding                     | 1117   |
| ENSG00000161243 | -1.070225938 | 0.619516458  | 0.000484894 | 0.005024367 | FBXO27         | protein_coding                     | 771    |
| ENSG00000196912 | -1.070738361 | 0.834899474  | 5.22E-05    | 0.000802732 | ANKRD36B       | protein_coding                     | 1504   |
| ENSG00000123610 | -1.070810512 | 3.508412844  | 1.48E-09    | 7.23E-08    | TNFAIP6        | protein_coding                     | 962.5  |
| ENSG00000110031 | -1.07085702  | 4.892981138  | 1.45E-14    | 1.57E-12    | LPXN           | protein_coding                     | 1833   |
| ENSG00000260231 | -1.071541218 | 0.943384407  | 0.000374869 | 0.004096652 | JHDM1D-AS1     | antisense                          | 2380   |
| ENSG00000223478 | -1.07251579  | -0.177740326 | 0.001574517 | 0.012980362 | RP11-545E17.3  | antisense                          | 544    |
| ENSG00000175832 | -1.07327734  | 1.245682907  | 0.002876917 | 0.020798548 | ETV4           | protein_coding                     | 1628   |
| ENSG00000181195 | -1.073971861 | 1.133195818  | 4.32E-05    | 0.000682844 | PENK           | protein_coding                     | 606    |
| ENSG00000273008 | -1.074083038 | -0.396729845 | 0.004932066 | 0.031611933 | RP11-351D16.3  | lincRNA                            | 1511   |
| ENSG00000048540 | -1.074418683 | 1.444057738  | 0.000357154 | 0.003947618 | LMO3           | protein_coding                     | 983    |
| ENSG00000221926 | -1.075092808 | 3.072704776  | 6.89E-12    | 4.95E-10    | TRIM16         | protein_coding                     | 568    |
| ENSG00000273729 | -1.075407093 | 0.030327508  | 0.004218435 | 0.028044806 | RP11-7F17.8    | antisense                          | 3487   |
| ENSG00000140961 | -1.076683405 | 0.890992743  | 9.66E-05    | 0.001339542 | OSGIN1         | protein_coding                     | 833    |
| ENSG00000235863 | -1.077311704 | 1.315599382  | 0.000128786 | 0.001706352 | B3GALT4        | protein_coding                     | 1247   |
| ENSG00000274012 | -1.077737319 | 3.582777206  | 1.44E-06    | 3.52E-05    | RN7SL2         | misc_RNA                           | 300    |
| ENSG00000279453 | -1.078213975 | 1.369222412  | 5.32E-07    | 1.45E-05    | RP3-425C14.4   | TEC                                | 2435   |
| ENSG00000185862 | -1.079330109 | 0.946141395  | 0.006209867 | 0.037779121 | EVI2B          | protein_coding                     | 1798   |
| ENSG00000160200 | -1.080706275 | 1.936113694  | 0.000485814 | 0.005027844 | CBS            | protein_coding                     | 828    |
| ENSG00000225264 | -1.085209181 | 0.239657817  | 0.006844332 | 0.040561384 | ZNRF2P2        | transcribed_processed_pseudogene   | 590    |
| ENSG00000271780 | -1.086600551 | -0.814996151 | 0.008721175 | 0.048316428 | RP11-1017G21.5 | lincRNA                            | 1079   |
| ENSG00000188015 | -1.088110914 | 1.32610277   | 5.68E-08    | 1.96E-06    | S100A3         | protein_coding                     | 717.5  |
| ENSG00000175040 | -1.088443503 | 3.002393446  | 3.00E-09    | 1.39E-07    | CHST2          | protein_coding                     | 4582   |
| ENSG00000196917 | -1.088857911 | 0.184374344  | 0.004822082 | 0.031109192 | HCAR1          | protein_coding                     | 4768   |
| ENSG00000214575 | -1.089403917 | 2.340411809  | 5.30E-05    | 0.000811505 | CPEB1          | protein_coding                     | 2038.5 |
| ENSG00000152953 | -1.090269859 | 2.080640357  | 1.22E-07    | 3.87E-06    | STK32B         | protein_coding                     | 1481   |
| ENSG00000187134 | -1.092635772 | 4.055413164  | 1.29E-11    | 8.59E-10    | AKR1C1         | protein_coding                     | 858    |
| ENSG00000175643 | -1.096115139 | 2.926505501  | 4.45E-07    | 1.24E-05    | RMI2           | protein_coding                     | 934    |
| ENSG00000198342 | -1.097202452 | 0.550119676  | 0.000222714 | 0.002661387 | ZNF442         | protein_coding                     | 1884   |
| ENSG00000163701 | -1.098594589 | -0.032358274 | 0.000818486 | 0.007703628 | IL17RE         | protein_coding                     | 2011   |
| ENSG00000227946 | -1.099149835 | 0.264803316  | 0.000571121 | 0.005732201 | AC007383.3     | lincRNA                            | 617    |
| ENSG00000185567 | -1.099169275 | 6.703288468  | 1.25E-15    | 1.60E-13    | AHNAK2         | protein_coding                     | 10845  |
| ENSG00000227199 | -1.099867468 | -0.160222142 | 0.000500975 | 0.005153846 | ST7-AS1        | antisense                          | 1889   |
| ENSG00000104419 | -1.100831013 | 6.739280914  | 4.57E-32    | 3.05E-29    | NDRG1          | protein_coding                     | 584    |
| ENSG00000266709 | -1.101482799 | 1.165887678  | 0.000183722 | 0.0022769   | RP11-214O1.2   | lincRNA                            | 1652   |
| ENSG00000247809 | -1.101901601 | 1.057024719  | 5.11E-05    | 0.000789249 | NR2F2-AS1      | antisense                          | 549    |
| ENSG00000112137 | -1.102924387 | -0.109069218 | 0.001297434 | 0.011199899 | PHACTR1        | protein_coding                     | 776    |
| ENSG00000256594 | -1.103764727 | 2.077112054  | 2.11E-07    | 6.39E-06    | RP11-705C15.2  | transcribed_unprocessed_pseudogene | 805    |
| ENSG00000008300 | -1.104692826 | 0.562043249  | 0.001887924 | 0.015013594 | CELSR3         | protein_coding                     | 3633   |
| ENSG00000099875 | -1.106441204 | 5.969060633  | 3.62E-09    | 1.64E-07    | MKMK2          | protein_coding                     | 1135   |
| ENSG00000259807 | -1.10948653  | 0.74412369   | 0.005159954 | 0.032798493 | RP11-426C22.4  | lincRNA                            | 2099   |
| ENSG00000197696 | -1.110139642 | 0.888851029  | 0.000398423 | 0.00429066  | NMB            | protein_coding                     | 1012   |
| ENSG00000143344 | -1.112444533 | 4.675233885  | 8.21E-24    | 2.27E-21    | RGL1           | protein_coding                     | 4912   |
| ENSG00000157514 | -1.115006699 | 4.410408573  | 2.47E-05    | 0.000418713 | TSC22D3        | protein_coding                     | 581    |
| ENSG00000163393 | -1.115651086 | 3.212166494  | 0.001823652 | 0.014637992 | SLC22A15       | protein_coding                     | 1230   |

|                 |              |              |             |             |               |                                    |        |
|-----------------|--------------|--------------|-------------|-------------|---------------|------------------------------------|--------|
| ENSG00000266265 | -1.117101209 | -0.508394261 | 0.001796716 | 0.014470808 | KLF14         | protein_coding                     | 2827   |
| ENSG00000269906 | -1.11718602  | -0.452167564 | 0.004236952 | 0.028137397 | RP11-248J18.2 | sense_intronic                     | 668    |
| ENSG00000057657 | -1.118512221 | 3.057737265  | 6.75E-02    | 2.88E-07    | PRDM1         | protein_coding                     | 649    |
| ENSG00000278530 | -1.120058454 | -0.013256476 | 0.003781762 | 0.025618747 | CHMP1B2P      | transcribed_unitary_pseudogene     | 3705   |
| ENSG00000133460 | -1.120726613 | 1.67090166   | 0.000709025 | 0.006843104 | SLC2A11       | protein_coding                     | 1048   |
| ENSG00000165171 | -1.124260744 | 0.892830698  | 0.00036644  | 0.004025784 | WBSCR27       | protein_coding                     | 823    |
| ENSG00000176909 | -1.124712588 | 1.1996824    | 9.68E-06    | 0.000187408 | MAMSTR        | protein_coding                     | 1693   |
| ENSG00000158406 | -1.128883133 | 0.532121252  | 0.000179444 | 0.002237054 | HIST1H4H      | protein_coding                     | 1034   |
| ENSG00000266865 | -1.129400191 | 1.619997178  | 0.000584848 | 0.005828495 | RP11-848P1.9  | transcribed_unprocessed_pseudogene | 534    |
| ENSG00000089091 | -1.12999342  | 0.803044589  | 0.001071269 | 0.009551072 | DZANK1        | protein_coding                     | 3156   |
| ENSG00000228451 | -1.131236643 | 1.323014487  | 8.24E-05    | 0.001178807 | SDAD1P1       | transcribed_processed_pseudogene   | 2612.5 |
| ENSG00000261499 | -1.131850276 | -0.729729568 | 0.009108867 | 0.049956441 | CH17-260O16.1 | unprocessed_pseudogene             | 1168   |
| ENSG00000140876 | -1.1354117   | -0.599621748 | 0.00568246  | 0.035222407 | NUDT7         | protein_coding                     | 899    |
| ENSG00000128510 | -1.136851256 | 2.247277161  | 4.38E-05    | 0.000690771 | CPA4          | protein_coding                     | 568    |
| ENSG00000249572 | -1.137848054 | -0.523679042 | 0.003554078 | 0.024411739 | CTD-2203K17.1 | antisense                          | 537    |
| ENSG00000165105 | -1.140686348 | 0.608934857  | 0.000473418 | 0.004934075 | RASEF         | protein_coding                     | 3670.5 |
| ENSG00000283689 | -1.142788523 | 0.663401895  | 0.000384992 | 0.00418081  | RP11-434E6.5  | antisense                          | 1064   |
| ENSG00000231445 | -1.143804769 | -0.139423177 | 0.006420827 | 0.038766444 | TIMM8AP1      | processed_pseudogene               | 295    |
| ENSG00000171246 | -1.145240699 | 0.200959689  | 0.002769396 | 0.020187052 | NPX1          | protein_coding                     | 2256.5 |
| ENSG00000149582 | -1.148160378 | 1.599509725  | 2.61E-05    | 0.000439249 | TMEM25        | protein_coding                     | 701.5  |
| ENSG00000232818 | -1.148415597 | -0.242698245 | 0.000207612 | 0.002506964 | RPS2P32       | processed_pseudogene               | 892    |
| ENSG00000254473 | -1.148903406 | 0.270985774  | 0.001972409 | 0.015556053 | RP11-522I20.3 | antisense                          | 753    |
| ENSG00000151617 | -1.150293562 | 1.765263907  | 1.27E-10    | 7.27E-09    | EDNRA         | protein_coding                     | 1569   |
| ENSG00000242147 | -1.150966657 | 0.12298628   | 0.00451903  | 0.029577939 | RP13-463N16.6 | lincRNA                            | 697    |
| ENSG00000237397 | -1.15169556  | -0.332987887 | 0.002685797 | 0.019723463 | ENTPD3-AS1    | antisense                          | 757.5  |
| ENSG00000246763 | -1.15340424  | 1.39371781   | 0.002516877 | 0.018769998 | RGMB-AS1      | antisense                          | 533    |
| ENSG00000174125 | -1.153518425 | -0.92939593  | 0.007990138 | 0.045483166 | TLR1          | protein_coding                     | 612    |
| ENSG00000213888 | -1.153800868 | 0.281960911  | 0.000351129 | 0.003890598 | LINC01521     | lincRNA                            | 1232   |
| ENSG00000205683 | -1.154667067 | 2.814887711  | 2.10E-05    | 0.000363094 | DPF3          | protein_coding                     | 853.5  |
| ENSG00000235954 | -1.155579142 | 0.308295092  | 0.003830974 | 0.025909744 | TTC28-AS1     | processed_transcript               | 706    |
| ENSG00000235865 | -1.156201202 | 0.142684032  | 0.008965134 | 0.049377385 | GSN-AS1       | antisense                          | 4763   |
| ENSG00000232973 | -1.156755792 | 0.73084897   | 0.000288414 | 0.003307177 | CYP1B1-AS1    | antisense                          | 612    |
| ENSG00000259802 | -1.164891715 | -0.959397769 | 0.005198129 | 0.033010749 | CTD-2256P15.2 | antisense                          | 901    |
| ENSG00000187650 | -1.168032071 | 1.365420865  | 0.001070555 | 0.009551072 | VMAC          | protein_coding                     | 2254   |
| ENSG00000172824 | -1.175002902 | 0.546944619  | 0.002282013 | 0.017432022 | CES4A         | protein_coding                     | 1825   |
| ENSG00000161653 | -1.175680689 | -0.378827414 | 0.00253139  | 0.018857031 | NAGS          | protein_coding                     | 1995   |
| ENSG00000067606 | -1.176053748 | 0.294165033  | 5.67E-05    | 0.000854864 | PRKCZ         | protein_coding                     | 702    |
| ENSG00000272994 | -1.17606568  | -0.128019829 | 0.002094389 | 0.016268832 | RP11-332H14.2 | lincRNA                            | 3449   |
| ENSG00000204428 | -1.177678223 | -0.894067676 | 0.008021559 | 0.045549345 | LY6G5C        | protein_coding                     | 674    |
| ENSG00000105327 | -1.178406969 | 3.619492351  | 7.59E-11    | 4.50E-09    | BBC3          | protein_coding                     | 1538   |
| ENSG00000198835 | -1.178608441 | 0.487135291  | 0.000182961 | 0.002269788 | GJC2          | protein_coding                     | 2243   |
| ENSG00000237489 | -1.182464402 | 0.745332313  | 0.000575823 | 0.005769099 | LINC00959     | protein_coding                     | 1834.5 |
| ENSG00000215790 | -1.18247417  | 1.455719639  | 0.000378437 | 0.004120423 | SLC35E2       | protein_coding                     | 1430   |
| ENSG00000275765 | -1.183731222 | -0.098973984 | 0.002172093 | 0.01674679  | RP11-54C4.3   | lincRNA                            | 726    |
| ENSG00000196812 | -1.183762642 | -0.700909376 | 0.007314555 | 0.042537805 | ZSCAN16       | protein_coding                     | 1328   |
| ENSG00000145536 | -1.184057111 | 0.844518919  | 0.001989974 | 0.015651492 | ADAMTS16      | protein_coding                     | 2954.5 |
| ENSG00000221821 | -1.185940532 | 1.332704824  | 2.74E-06    | 6.27E-05    | C6orf226      | protein_coding                     | 552    |
| ENSG00000265817 | -1.18673342  | -0.490020713 | 0.007487401 | 0.043287711 | FSBP          | protein_coding                     | 1815   |
| ENSG00000168646 | -1.187291062 | 3.201046075  | 6.10E-15    | 7.06E-13    | AXIN2         | protein_coding                     | 1034   |
| ENSG00000137198 | -1.188052084 | -0.032558036 | 0.000539722 | 0.005473488 | GMPT          | protein_coding                     | 771.5  |
| ENSG00000149798 | -1.191815024 | 4.244719595  | 1.45E-23    | 3.96E-21    | CDC42EP2      | protein_coding                     | 1651   |
| ENSG00000059377 | -1.193506367 | -0.34499285  | 0.000726043 | 0.006977088 | TBXAS1        | protein_coding                     | 1435   |
| ENSG00000116584 | -1.194267659 | 7.061549984  | 6.77E-06    | 0.000138293 | ARHGEF2       | protein_coding                     | 792    |
| ENSG00000267100 | -1.195397938 | 2.167503509  | 3.33E-10    | 1.77E-08    | ILF3-AS1      | lincRNA                            | 1983   |
| ENSG00000275993 | -1.195572357 | 1.301684442  | 0.000340044 | 0.003786002 | CH507-42P11.8 | protein_coding                     | 2588   |
| ENSG00000164185 | -1.195730108 | -0.762031251 | 0.003985299 | 0.0267352   | ZNF474        | protein_coding                     | 572    |
| ENSG00000144218 | -1.200394517 | 1.202194771  | 0.002010876 | 0.015785909 | AF3           | protein_coding                     | 591    |
| ENSG00000135069 | -1.200871755 | 7.751751344  | 7.52E-12    | 5.34E-10    | PSAT1         | protein_coding                     | 1799.5 |
| ENSG00000247092 | -1.20089152  | 1.021477172  | 0.000223438 | 0.002666362 | SNHG10        | antisense                          | 704.5  |
| ENSG00000257027 | -1.202353882 | 0.467732389  | 3.82E-05    | 0.000613675 | RP11-705C15.3 | sense_intronic                     | 2508   |
| ENSG00000213920 | -1.202489543 | -0.062110449 | 0.001426352 | 0.012055087 | MDP1          | protein_coding                     | 578    |
| ENSG00000184786 | -1.210368101 | -0.653400345 | 0.002352932 | 0.017816039 | TCTE3         | protein_coding                     | 1423.5 |
| ENSG00000260563 | -1.212027132 | -0.623620266 | 0.008462051 | 0.047285651 | RP13-516M14.1 | lincRNA                            | 1195   |
| ENSG00000260114 | -1.212155401 | 0.018728135  | 0.007317707 | 0.042544185 | CTD-2574D22.4 | sense_intronic                     | 2272   |
| ENSG00000256073 | -1.216268973 | 0.617288384  | 1.75E-05    | 0.000311202 | URB1-AS1      | lincRNA                            | 831    |
| ENSG00000231711 | -1.216614812 | 0.821892658  | 0.000737995 | 0.007059186 | LINC00899     | processed_transcript               | 2584   |
| ENSG00000175567 | -1.220520756 | 0.365144983  | 0.000194869 | 0.002382254 | UCP2          | protein_coding                     | 552.5  |
| ENSG00000169282 | -1.221825523 | 2.795231797  | 5.80E-12    | 4.21E-10    | KCNAB1        | protein_coding                     | 580    |
| ENSG00000196754 | -1.222364111 | -0.326846244 | 0.002304383 | 0.017544445 | S100A2        | protein_coding                     | 626.5  |
| ENSG00000157873 | -1.222703027 | 2.360835609  | 0.000962782 | 0.008778199 | TNFRSF14      | protein_coding                     | 884    |
| ENSG00000214756 | -1.223364209 | 1.152780406  | 8.62E-07    | 2.23E-05    | METTL12       | protein_coding                     | 1702.5 |
| ENSG00000261737 | -1.226065686 | -0.598988788 | 0.00084539  | 0.007925389 | RP4-612B15.3  | antisense                          | 961    |
| ENSG00000129194 | -1.23125843  | -0.806570508 | 0.003530396 | 0.024305506 | SOX15         | protein_coding                     | 1093   |
| ENSG00000235374 | -1.238528532 | 0.580700282  | 0.00184534  | 0.014751212 | SSR4P1        | transcribed_processed_pseudogene   | 967    |
| ENSG00000230918 | -1.240338378 | -0.026775592 | 0.005455923 | 0.034238394 | AC008063.2    | antisense                          | 640    |
| ENSG00000106336 | -1.243582375 | -0.871244307 | 0.00721083  | 0.04208858  | FBXO24        | protein_coding                     | 1330   |
| ENSG00000186364 | -1.2441723   | 0.95498896   | 4.20E-05    | 0.00066659  | NUDT17        | protein_coding                     | 873    |
| ENSG00000229124 | -1.244677973 | -0.269923766 | 0.000189737 | 0.002326386 | VIM-AS1       | antisense                          | 1134.5 |
| ENSG00000232442 | -1.245850562 | 0.613697096  | 2.17E-05    | 0.00037283  | CTD-3184A7.4  | antisense                          | 691.5  |
| ENSG00000235109 | -1.251580328 | 1.727048454  | 0.000956717 | 0.008743447 | ZSCAN31       | protein_coding                     | 706    |

|                 |              |              |             |             |                 |                                    |        |
|-----------------|--------------|--------------|-------------|-------------|-----------------|------------------------------------|--------|
| ENSG00000174611 | -1.251917528 | -0.150896254 | 0.001008448 | 0.009107697 | KY              | protein_coding                     | 2345   |
| ENSG00000130943 | -1.252857521 | -0.867162093 | 0.008417183 | 0.047123936 | PKDREJ          | protein_coding                     | 7693   |
| ENSG00000174370 | -1.257905381 | 1.431705985  | 5.38E-06    | 0.000112688 | C11orf45        | protein_coding                     | 609    |
| ENSG00000176438 | -1.261122726 | 3.86441469   | 1.87E-08    | 7.16E-07    | SYNE3           | protein_coding                     | 3275   |
| ENSG00000221890 | -1.262111921 | 0.831876716  | 4.73E-06    | 0.000100834 | NPTXR           | protein_coding                     | 5784   |
| ENSG00000105514 | -1.263455564 | 1.596197417  | 8.22E-08    | 2.75E-06    | RAB3D           | protein_coding                     | 2598.5 |
| ENSG00000205791 | -1.267682022 | -0.2278238   | 0.001446142 | 0.0121691   | LOH12CR2        | lincRNA                            | 1540   |
| ENSG00000168916 | -1.267878477 | 1.330231817  | 0.005237569 | 0.033210294 | ZNF608          | protein_coding                     | 2645.5 |
| ENSG00000261455 | -1.268098785 | 0.663104015  | 5.15E-07    | 1.41E-05    | LINC01003       | lincRNA                            | 1764   |
| ENSG00000214193 | -1.269618036 | 1.38542925   | 0.003904776 | 0.026297237 | SH3D21          | protein_coding                     | 2043   |
| ENSG00000153879 | -1.269654814 | 5.309420291  | 2.34E-06    | 5.49E-05    | CEBPG           | protein_coding                     | 3977   |
| ENSG00000168621 | -1.270966714 | 3.154577387  | 2.26E-11    | 1.45E-09    | GDNF            | protein_coding                     | 817    |
| ENSG00000280187 | -1.271953968 | 1.257817949  | 3.61E-07    | 1.03E-05    | CTC-351M12.1    | TEC                                | 3094   |
| ENSG00000228544 | -1.274163714 | -0.210493435 | 0.001141197 | 0.010048069 | CCDC183-AS1     | antisense                          | 2386   |
| ENSG00000159917 | -1.274782752 | 0.24466868   | 0.001472714 | 0.012337551 | ZNF235          | protein_coding                     | 955    |
| ENSG00000196517 | -1.277935998 | 4.659403436  | 1.43E-05    | 0.000259887 | SLC6A9          | protein_coding                     | 1881   |
| ENSG00000272523 | -1.278308416 | -0.045292702 | 0.000289228 | 0.003312844 | LINC01023       | lincRNA                            | 436    |
| ENSG00000267216 | -1.279267457 | -1.213024691 | 0.007210888 | 0.04208858  | AC010642.1      | protein_coding                     | 4227   |
| ENSG00000224086 | -1.279780408 | 2.301176109  | 2.73E-06    | 6.25E-05    | LL22NC03-86G7.1 | antisense                          | 37852  |
| ENSG00000132623 | -1.280463903 | -0.250641234 | 0.000378846 | 0.004122716 | ANKEF1          | protein_coding                     | 2849.5 |
| ENSG00000172061 | -1.280767313 | 3.121749265  | 2.04E-13    | 1.81E-11    | LRRC15          | protein_coding                     | 4565.5 |
| ENSG00000197935 | -1.281055384 | 0.437513761  | 0.004433381 | 0.02910012  | ZNF311          | protein_coding                     | 2878.5 |
| ENSG00000254531 | -1.283753686 | 1.529983746  | 1.34E-07    | 4.22E-06    | FLJ20021        | lincRNA                            | 616    |
| ENSG00000188064 | -1.285240606 | 3.092264888  | 0.002296113 | 0.017504685 | WNT7B           | protein_coding                     | 2202   |
| ENSG0000023745  | -1.287868281 | 1.754477377  | 0.009083545 | 0.049870396 | CCDC18-AS1      | processed_transcript               | 513.5  |
| ENSG00000106123 | -1.287998602 | -0.391810631 | 0.004829554 | 0.031141587 | EPHB6           | protein_coding                     | 3224   |
| ENSG00000274712 | -1.288147204 | -0.300596159 | 0.007999809 | 0.045494205 | RP11-147L13.15  | lincRNA                            | 2005   |
| ENSG00000168528 | -1.288156843 | 3.95986454   | 3.98E-19    | 7.03E-17    | SERINC2         | protein_coding                     | 2067   |
| ENSG00000231672 | -1.28883034  | -0.357637813 | 0.001344125 | 0.011496726 | DIRC3           | protein_coding                     | 1621   |
| ENSG00000074935 | -1.2898145   | 4.379101366  | 0.000472348 | 0.004927882 | TUBE1           | protein_coding                     | 726    |
| ENSG00000197119 | -1.291062081 | 1.953544622  | 7.73E-06    | 0.000153243 | SLC25A29        | protein_coding                     | 776.5  |
| ENSG00000170891 | -1.291215852 | -0.247266611 | 0.002746047 | 0.020052148 | CYTL1           | protein_coding                     | 553    |
| ENSG00000279086 | -1.291525136 | -0.259717785 | 0.000723323 | 0.006954173 | RP11-667F14.1   | TEC                                | 2278   |
| ENSG00000280138 | -1.293155817 | -0.221268967 | 0.000581983 | 0.005811129 | RP11-463O12.5   | TEC                                | 18662  |
| ENSG00000164850 | -1.29349166  | 3.617667423  | 8.07E-08    | 2.70E-06    | GP1R1           | protein_coding                     | 1900   |
| ENSG00000166046 | -1.295250034 | 3.326397363  | 4.19E-05    | 0.000664318 | TCP11L2         | protein_coding                     | 805    |
| ENSG00000188596 | -1.297146937 | 0.035102923  | 0.000282755 | 0.003256349 | CFAP54          | protein_coding                     | 2323   |
| ENSG00000259877 | -1.30287559  | 0.351483526  | 2.50E-05    | 0.000422292 | RP11-46C24.7    | antisense                          | 2443   |
| ENSG00000162997 | -1.304324496 | -0.91350356  | 0.00902726  | 0.049679918 | PRORSD1P        | transcribed_unitary_pseudogene     | 626    |
| ENSG00000115257 | -1.305016648 | -0.292576113 | 0.002862296 | 0.020725623 | PCSK4           | protein_coding                     | 720    |
| ENSG00000188825 | -1.306283565 | 0.66342708   | 0.000425262 | 0.004537225 | LINC00910       | lincRNA                            | 1672.5 |
| ENSG00000263874 | -1.308455593 | -0.492993876 | 0.002736627 | 0.019997464 | LINC00672       | protein_coding                     | 3692   |
| ENSG00000114626 | -1.316927391 | 3.0310115957 | 2.66E-07    | 7.89E-06    | ABTB1           | protein_coding                     | 818    |
| ENSG00000174343 | -1.320225643 | -1.138859149 | 0.003115415 | 0.022110052 | CHRNA9          | protein_coding                     | 622    |
| ENSG00000182796 | -1.320490259 | 2.613211258  | 0.003414966 | 0.023715805 | TMEM198B        | transcribed_unitary_pseudogene     | 633    |
| ENSG00000232977 | -1.320700725 | -0.233442008 | 0.000139267 | 0.001823056 | LINC00327       | lincRNA                            | 1308   |
| ENSG00000173253 | -1.320833732 | -0.9632969   | 0.008551887 | 0.047633412 | DMRT2           | protein_coding                     | 1965   |
| ENSG00000167191 | -1.321034704 | 3.576613952  | 1.79E-05    | 0.0003174   | GPRC5B          | protein_coding                     | 818    |
| ENSG00000172927 | -1.322531472 | 0.578833743  | 3.37E-05    | 0.000550052 | MYEOV           | protein_coding                     | 616    |
| ENSG00000183840 | -1.322537686 | 0.485966632  | 2.65E-06    | 6.10E-05    | GPR39           | protein_coding                     | 2013   |
| ENSG00000134242 | -1.322720084 | 1.655127532  | 4.57E-12    | 3.36E-10    | PTPN22          | protein_coding                     | 2258   |
| ENSG00000114251 | -1.323962614 | 7.14582391   | 6.82E-31    | 4.15E-28    | WNT5A           | protein_coding                     | 894    |
| ENSG00000244586 | -1.324406953 | 2.267182692  | 1.83E-09    | 8.83E-08    | WNT5A-AS1       | antisense                          | 500    |
| ENSG00000137098 | -1.32500418  | -0.946018525 | 0.006689908 | 0.039900622 | SPAG8           | protein_coding                     | 920.5  |
| ENSG00000165879 | -1.32722613  | 0.402864777  | 2.04E-06    | 4.84E-05    | FRAT1           | protein_coding                     | 1641   |
| ENSG00000122432 | -1.327756217 | -0.878031001 | 0.004448088 | 0.029187403 | SPATA1          | transcribed_unprocessed_pseudogene | 776    |
| ENSG00000260236 | -1.327842812 | -0.460729399 | 0.000946966 | 0.008677308 | RP11-708J19.1   | antisense                          | 1911   |
| ENSG00000126950 | -1.329940021 | 0.574092006  | 0.001685985 | 0.013740679 | TMEM35A         | protein_coding                     | 1469   |
| ENSG00000156689 | -1.330377296 | -0.100504574 | 4.30E-05    | 0.000680474 | GLYATL2         | protein_coding                     | 1488   |
| ENSG00000189014 | -1.33230967  | -1.013939531 | 0.008103416 | 0.045800667 | FAM35DP         | unprocessed_pseudogene             | 2712   |
| ENSG00000162522 | -1.332440626 | 4.524340263  | 9.48E-25    | 2.84E-22    | KIAA1522        | protein_coding                     | 5293   |
| ENSG00000196611 | -1.332457064 | 3.793443826  | 7.29E-15    | 8.29E-13    | MMP1            | protein_coding                     | 1970   |
| ENSG00000182359 | -1.333940093 | 0.944106125  | 0.000750088 | 0.007164936 | KBTBD3          | protein_coding                     | 874    |
| ENSG00000107611 | -1.334150875 | 2.140166546  | 1.39E-06    | 3.41E-05    | CUBN            | protein_coding                     | 831.5  |
| ENSG00000271882 | -1.337118984 | -0.182233902 | 0.001080009 | 0.009611473 | KB-1410C5.5     | lincRNA                            | 411    |
| ENSG00000102048 | -1.346891473 | -0.556677142 | 0.000481345 | 0.004996583 | ASB9            | protein_coding                     | 1153   |
| ENSG00000245522 | -1.348043175 | 0.942809428  | 7.96E-05    | 0.001143173 | RP11-540A21.2   | lincRNA                            | 2239.5 |
| ENSG00000138678 | -1.348075198 | -0.762715107 | 0.000538511 | 0.005466676 | GPAT3           | protein_coding                     | 647    |
| ENSG00000255364 | -1.348945911 | -0.680801868 | 0.001825303 | 0.014645562 | RP11-94A24.1    | lincRNA                            | 553    |
| ENSG00000256591 | -1.352974665 | -1.013756245 | 0.007835644 | 0.044837895 | RP11-286N22.8   | protein_coding                     | 585.5  |
| ENSG00000138030 | -1.355688266 | -0.801100043 | 0.001913104 | 0.015185308 | KHK             | protein_coding                     | 1349.5 |
| ENSG00000259605 | -1.356396037 | -0.123449822 | 0.000280127 | 0.003228242 | AC074212.5      | processed_transcript               | 1411   |
| ENSG00000226696 | -1.356915326 | -0.125078125 | 0.004427748 | 0.029072363 | LENG8-AS1       | antisense                          | 582    |
| ENSG00000270021 | -1.362655688 | -0.505558959 | 0.001573729 | 0.012979034 | CTC-203F.4.2    | antisense                          | 2017   |
| ENSG00000184363 | -1.364474914 | 1.24287443   | 1.04E-06    | 2.65E-05    | PKP3            | protein_coding                     | 687    |
| ENSG00000246273 | -1.375411375 | 1.411791031  | 9.31E-08    | 3.03E-06    | SBF2-AS1        | antisense                          | 716.5  |
| ENSG00000184368 | -1.375883299 | 0.236320158  | 2.17E-05    | 0.000373466 | MAP7D2          | protein_coding                     | 2476   |
| ENSG00000198576 | -1.376516231 | 0.122266704  | 0.000173457 | 0.002175728 | ARC             | protein_coding                     | 1677.5 |
| ENSG00000247950 | -1.382529521 | -0.915699646 | 0.003206334 | 0.022583159 | SEC24B-AS1      | antisense                          | 878.5  |
| ENSG00000245317 | -1.383690103 | -0.844051008 | 0.00469767  | 0.030506133 | CTC-241N9.1     | lincRNA                            | 1454   |



|                 |              |              |             |             |                    |                                    |        |
|-----------------|--------------|--------------|-------------|-------------|--------------------|------------------------------------|--------|
| ENSG00000231652 | -1.38371323  | -0.328154589 | 3.00E-05    | 0.000495585 | RP11-553A21.3      | antisense                          | 1973   |
| ENSG00000154133 | -1.393533628 | 1.114410418  | 2.25E-05    | 0.000384694 | ROBO4              | protein_coding                     | 752.5  |
| ENSG00000175611 | -1.397096236 | 0.675924829  | 8.44E-07    | 2.19E-05    | LINC00476          | processed_transcript               | 966.5  |
| ENSG00000260329 | -1.397612138 | 0.160894911  | 1.61E-05    | 0.000289224 | RP11-412D9.4       | antisense                          | 1469   |
| ENSG00000250222 | -1.404273772 | -0.965620179 | 0.00859528  | 0.047797974 | CTC-338M12.5       | antisense                          | 340.5  |
| ENSG00000167550 | -1.409055085 | -0.900628496 | 0.007984135 | 0.045473994 | RHEBL1             | protein_coding                     | 1136.5 |
| ENSG00000163814 | -1.410146508 | 3.141694172  | 7.37E-06    | 0.000147552 | CDCP1              | protein_coding                     | 1416   |
| ENSG00000269403 | -1.411156633 | -1.139815602 | 0.00318214  | 0.022460443 | CTD-2616J11.11     | protein_coding                     | 551    |
| ENSG00000273253 | -1.412251785 | -0.940483358 | 0.002959852 | 0.021305379 | RP3-402G11.26      | antisense                          | 1001   |
| ENSG00000166165 | -1.412784316 | 2.019876111  | 1.64E-07    | 5.08E-06    | CKB                | protein_coding                     | 746    |
| ENSG00000272501 | -1.41318515  | -0.269764068 | 0.007622926 | 0.043887457 | XXbac-BPG299F13.17 | antisense                          | 2838   |
| ENSG00000146733 | -1.413778112 | 4.998196828  | 1.07E-12    | 8.49E-11    | PSPH               | protein_coding                     | 741.5  |
| ENSG00000268996 | -1.416978896 | 0.812110393  | 2.93E-06    | 6.66E-05    | MAN1B1-AS1         | antisense                          | 1872   |
| ENSG00000103241 | -1.417382314 | 1.772002777  | 7.61E-06    | 0.000151643 | FOXF1              | protein_coding                     | 3516   |
| ENSG00000090661 | -1.419019781 | -0.755856588 | 0.007527268 | 0.043452225 | CERS4              | protein_coding                     | 763    |
| ENSG00000141682 | -1.419976841 | 3.373378995  | 4.17E-06    | 8.97E-05    | PMAIP1             | protein_coding                     | 1262   |
| ENSG00000260018 | -1.42029116  | -0.871474057 | 0.000812909 | 0.007662241 | RP11-505K9.1       | antisense                          | 521    |
| ENSG00000259744 | -1.421957413 | -1.653919168 | 0.008233025 | 0.046419196 | RP11-138H8.6       | sense_intronic                     | 755    |
| ENSG00000177076 | -1.422048269 | -0.19935105  | 6.19E-05    | 0.000920065 | ACER2              | protein_coding                     | 2238   |
| ENSG00000164136 | -1.430369014 | 0.979474778  | 1.82E-06    | 4.37E-05    | IL15               | protein_coding                     | 1417.5 |
| ENSG00000258057 | -1.433672139 | -0.464829552 | 0.003385304 | 0.023541393 | BCDIN3D-AS1        | antisense                          | 813    |
| ENSG00000101342 | -1.435901313 | -1.079925053 | 0.004856186 | 0.031270757 | TLCD2              | protein_coding                     | 1448   |
| ENSG00000221990 | -1.438366714 | 1.116779042  | 7.62E-10    | 3.91E-08    | EXOC3-AS1          | antisense                          | 1638.5 |
| ENSG00000268575 | -1.44241764  | 0.481854281  | 0.003135136 | 0.022222891 | RP1-283E3.8        | processed_transcript               | 5079   |
| ENSG00000226314 | -1.44423097  | 0.189038836  | 0.004983886 | 0.031865175 | ZNF192P1           | transcribed_unprocessed_pseudogene | 962    |
| ENSG00000187605 | -1.444830684 | 3.002499052  | 1.99E-13    | 1.78E-11    | TET3               | protein_coding                     | 3391   |
| ENSG00000231908 | -1.449820725 | -1.208224148 | 0.002392621 | 0.018024292 | IDH1-AS1           | antisense                          | 476.5  |
| ENSG00000232415 | -1.452966498 | -1.373680499 | 0.00576848  | 0.035617013 | CTB-51J22.1        | antisense                          | 532    |
| ENSG00000235813 | -1.453849557 | -0.274886375 | 0.006605798 | 0.039560284 | RP11-308B5.2       | lincRNA                            | 938    |
| ENSG00000069482 | -1.455252818 | -0.213556344 | 0.001497144 | 0.012521951 | GAL                | protein_coding                     | 732    |
| ENSG00000113369 | -1.458350402 | 5.34232051   | 3.05E-15    | 3.68E-13    | ARRDC3             | protein_coding                     | 564    |
| ENSG00000145358 | -1.461384991 | 1.676595206  | 0.000107466 | 0.00147482  | DDIT4L             | protein_coding                     | 852    |
| ENSG00000139597 | -1.465378602 | -0.090724879 | 0.004305819 | 0.028460234 | N4BP2L1            | protein_coding                     | 1953   |
| ENSG00000102349 | -1.467011198 | -0.604607702 | 0.001986048 | 0.015638665 | KLF8               | protein_coding                     | 4821   |
| ENSG00000228798 | -1.468145315 | -0.760592986 | 0.005700213 | 0.035269108 | AP000473.5         | lincRNA                            | 526.5  |
| ENSG00000254876 | -1.469028886 | 0.153961062  | 0.003475339 | 0.024030314 | RP11-23J9.5        | processed_transcript               | 2368   |
| ENSG00000146950 | -1.469700237 | 0.856172482  | 0.000148247 | 0.001910416 | SHROOM2            | protein_coding                     | 3445.5 |
| ENSG00000124875 | -1.471500211 | 1.973716441  | 4.90E-14    | 4.83E-12    | CXCL6              | protein_coding                     | 557    |
| ENSG00000250067 | -1.477872908 | 0.103200763  | 0.00607506  | 0.037131202 | YJFN3              | protein_coding                     | 995    |
| ENSG00000146592 | -1.478201805 | 2.260921178  | 2.74E-14    | 2.81E-12    | CREB5              | protein_coding                     | 752    |
| ENSG00000126246 | -1.480872813 | -1.383495654 | 0.004470461 | 0.029297081 | IGFLR1             | protein_coding                     | 593    |
| ENSG00000172901 | -1.489465336 | -1.482273551 | 0.006758849 | 0.040232537 | LVRN               | protein_coding                     | 2391   |
| ENSG00000255046 | -1.491648387 | -1.058767124 | 0.004699545 | 0.03050874  | RP11-297N6.4       | lincRNA                            | 641    |
| ENSG00000139725 | -1.493857402 | -0.091035222 | 9.54E-05    | 0.001326667 | RHOF               | protein_coding                     | 1219   |
| ENSG00000257038 | -1.496421356 | -0.150077395 | 6.12E-05    | 0.000913811 | RP11-800A3.7       | antisense                          | 1695   |
| ENSG00000135437 | -1.502103044 | 0.227065156  | 7.69E-05    | 0.001111892 | RDH5               | protein_coding                     | 971    |
| ENSG00000171346 | -1.503094836 | -0.524947141 | 0.000164268 | 0.002081427 | KRT15              | protein_coding                     | 931    |
| ENSG00000115138 | -1.503533451 | -0.732519853 | 0.001004442 | 0.009087372 | POMC               | protein_coding                     | 1074   |
| ENSG00000153404 | -1.506685871 | -1.390871069 | 0.001003067 | 0.009086032 | PLEKHG4B           | protein_coding                     | 6840   |
| ENSG00000280132 | -1.506922941 | -0.398407705 | 0.000119537 | 0.008213338 | DNER               | TEC                                | 1905   |
| ENSG00000226754 | -1.507090582 | -0.903493714 | 0.001369391 | 0.011675061 | RP5-1024G6.5       | antisense                          | 1181   |
| ENSG00000213057 | -1.507176821 | -0.256035772 | 0.00858718  | 0.047773526 | C1orf220           | lincRNA                            | 1576.5 |
| ENSG00000224116 | -1.508510197 | -1.375033779 | 0.008968991 | 0.049385492 | INHBA-AS1          | antisense                          | 2312   |
| ENSG00000173269 | -1.508868119 | 0.844493778  | 1.20E-08    | 4.84E-07    | MMRN2              | protein_coding                     | 829    |
| ENSG00000237840 | -1.50984656  | -1.028177754 | 0.004173812 | 0.027801694 | FAM21FP            | transcribed_unprocessed_pseudogene | 752    |
| ENSG00000243406 | -1.512084288 | -0.720273925 | 0.00320716  | 0.022583159 | MRPS31P5           | transcribed_unprocessed_pseudogene | 564    |
| ENSG00000187957 | -1.515213505 | -0.96672219  | 0.000884831 | 0.008213338 | DNER               | protein_coding                     | 2051   |
| ENSG00000205336 | -1.515221602 | -0.648887878 | 0.004553159 | 0.029726249 | ADGRG1             | protein_coding                     | 579    |
| ENSG00000143061 | -1.516202971 | -0.915768701 | 0.000721194 | 0.006939969 | IGSF3              | protein_coding                     | 5548   |
| ENSG00000267279 | -1.516271348 | -0.824443034 | 0.002286778 | 0.01745554  | RP11-879F14.2      | lincRNA                            | 694    |
| ENSG00000160097 | -1.517705295 | 1.682999072  | 8.94E-05    | 0.001262452 | FNDC5              | protein_coding                     | 622    |
| ENSG00000254614 | -1.518622981 | 0.420557778  | 5.67E-06    | 0.000117794 | AP003068.23        | antisense                          | 1069.5 |
| ENSG00000268573 | -1.518954027 | -0.830247608 | 0.00011379  | 0.00154624  | RP11-158H5.7       | lincRNA                            | 4382   |
| ENSG00000258938 | -1.526608935 | -0.632637484 | 0.007898456 | 0.045116825 | RP11-317N8.5       | antisense                          | 2867   |
| ENSG00000283050 | -1.528559867 | 0.642529658  | 0.0014291   | 0.012055087 | GTF2IP12           | transcribed_unprocessed_pseudogene | 939    |
| ENSG00000144821 | -1.529222756 | 1.645008036  | 3.40E-07    | 9.77E-06    | MYH15              | protein_coding                     | 3207   |
| ENSG00000116761 | -1.530396263 | 3.973170716  | 7.30E-07    | 1.92E-05    | CTH                | protein_coding                     | 1196   |
| ENSG00000260001 | -1.531324336 | -1.041789368 | 0.0043279   | 0.02855247  | TGFBR3L            | protein_coding                     | 719    |
| ENSG00000002745 | -1.532570232 | 0.212980636  | 0.003636658 | 0.024847095 | WNT16              | protein_coding                     | 2188.5 |
| ENSG00000273702 | -1.535203761 | -1.243694316 | 0.009051842 | 0.049788735 | RP11-758H9.2       | lincRNA                            | 1162   |
| ENSG00000245281 | -1.53544989  | -1.092512369 | 0.001369967 | 0.011675162 | CTD-2547L16.1      | antisense                          | 646    |
| ENSG00000227540 | -1.537458677 | -1.06358351  | 0.002296597 | 0.017504685 | DNAJC9-AS1         | antisense                          | 635    |
| ENSG00000213145 | -1.538017426 | -0.539388758 | 0.00022338  | 0.002666362 | CRIP1              | protein_coding                     | 994    |
| ENSG00000204291 | -1.538235817 | 3.81900434   | 1.75E-12    | 1.35E-10    | COL15A1            | protein_coding                     | 1412   |
| ENSG00000253878 | -1.541261671 | -1.240880254 | 0.00746787  | 0.043198918 | RP11-347C18.3      | sense_intronic                     | 579    |
| ENSG00000110455 | -1.542165376 | 2.447554635  | 0.001308382 | 0.011284998 | ACCS               | protein_coding                     | 884    |
| ENSG00000249992 | -1.549260531 | 4.324125841  | 4.50E-05    | 0.000706575 | TMEM158            | protein_coding                     | 1813   |
| ENSG00000130766 | -1.558579465 | 5.826500673  | 6.05E-08    | 2.08E-06    | SESN2              | protein_coding                     | 3453   |
| ENSG00000154153 | -1.562488426 | -1.234028569 | 0.00630357  | 0.038203287 | FAM134B            | protein_coding                     | 930.5  |
| ENSG00000146054 | -1.562791143 | -0.729609339 | 0.001660897 | 0.013546878 | TRIM7              | protein_coding                     | 2320   |

|                 |              |              |             |             |                |                                |        |
|-----------------|--------------|--------------|-------------|-------------|----------------|--------------------------------|--------|
| ENSG00000204228 | -1.570275054 | -0.176063513 | 7.14E-05    | 0.001042967 | HSD17B8        | protein_coding                 | 961.5  |
| ENSG00000134463 | -1.574833311 | -0.669569346 | 0.000420475 | 0.00449309  | ECHDC3         | protein_coding                 | 854    |
| ENSG00000260868 | -1.575867237 | -1.636252364 | 0.002574868 | 0.019112168 | RP11-394I13.1  | lincRNA                        | 1884   |
| ENSG00000042062 | -1.579037684 | 0.459103502  | 0.004462287 | 0.029262034 | FAM65C         | protein_coding                 | 1892   |
| ENSG00000212694 | -1.579553798 | 1.534621147  | 0.000377337 | 0.00411278  | LINC01089      | lincRNA                        | 944.5  |
| ENSG00000196932 | -1.580595558 | 1.415927581  | 0.000387742 | 0.004200889 | TMEM26         | protein_coding                 | 2520   |
| ENSG00000178726 | -1.581134518 | 0.855232255  | 3.47E-05    | 0.000564339 | THBD           | protein_coding                 | 4109   |
| ENSG00000200279 | -1.585943581 | -1.625897481 | 0.008245065 | 0.046449141 | SNORD114-10    | snoRNA                         | 72     |
| ENSG00000139946 | -1.587494333 | 1.129716297  | 1.42E-12    | 1.11E-10    | PELI2          | protein_coding                 | 774    |
| ENSG00000168490 | -1.58906489  | -0.520741479 | 0.00019989  | 0.002427868 | PHYHIP         | protein_coding                 | 847    |
| ENSG00000168003 | -1.589790122 | 6.569211777  | 1.24E-14    | 1.36E-12    | SLC3A2         | protein_coding                 | 597    |
| ENSG00000273142 | -1.591761913 | 1.032855944  | 0.003042037 | 0.021709303 | RP11-458F8.4   | lincRNA                        | 3441   |
| ENSG00000225511 | -1.59177289  | 0.732921982  | 0.000153363 | 0.001964126 | LINC00475      | lincRNA                        | 589.5  |
| ENSG00000232679 | -1.592817671 | 0.670128747  | 1.08E-07    | 3.47E-06    | RP11-400N13.3  | lincRNA                        | 562    |
| ENSG00000214279 | -1.592904401 | -0.16692613  | 0.008843808 | 0.048821507 | SCART1         | transcribed_unitary_pseudogene | 4080   |
| ENSG00000261879 | -1.59389798  | -0.516325402 | 0.003079772 | 0.021932256 | RP11-333E1.1   | antisense                      | 554    |
| ENSG00000181885 | -1.595481822 | -0.268808158 | 0.000566777 | 0.005694997 | CLDN7          | protein_coding                 | 807    |
| ENSG00000234028 | -1.595588072 | -0.370774499 | 0.000227427 | 0.00270366  | AC062029.1     | antisense                      | 2632.5 |
| ENSG00000172361 | -1.596644828 | -1.185536208 | 0.007047492 | 0.041415016 | CFAP53         | protein_coding                 | 1851   |
| ENSG00000091137 | -1.598828442 | 0.012860921  | 0.000580011 | 0.005802632 | SLC26A4        | protein_coding                 | 596    |
| ENSG00000258311 | -1.601310884 | -0.265561618 | 0.000182918 | 0.002269788 | RP11-644F5.10  | protein_coding                 | 884.5  |
| ENSG00000274565 | -1.604042035 | 1.488118668  | 9.39E-05    | 0.001310215 | CTD-3035K23.7  | antisense                      | 1154   |
| ENSG00000234779 | -1.606361031 | 0.235871563  | 3.11E-09    | 1.43E-07    | RP11-62F24.2   | antisense                      | 428    |
| ENSG00000275880 | -1.608506227 | 0.280326754  | 8.79E-09    | 3.65E-07    | RP11-90L1.8    | antisense                      | 3272   |
| ENSG00000261371 | -1.608537946 | 0.347671765  | 2.23E-09    | 1.06E-07    | PECAM1         | protein_coding                 | 580    |
| ENSG00000105339 | -1.609915286 | 1.226608507  | 6.69E-08    | 2.27E-06    | DENND3         | protein_coding                 | 1104.5 |
| ENSG00000262468 | -1.61263916  | -0.671518573 | 0.003199552 | 0.022558144 | LINC01569      | lincRNA                        | 753    |
| ENSG00000130702 | -1.612791347 | 3.903625887  | 3.50E-11    | 2.18E-09    | LAMA5          | protein_coding                 | 637    |
| ENSG00000275713 | -1.616974331 | -1.315247017 | 0.001837083 | 0.0147059   | HIST1H2BH      | protein_coding                 | 2060   |
| ENSG00000275719 | -1.6198264   | -1.116651901 | 0.001710903 | 0.013894544 | CTB-147N14.6   | antisense                      | 1227   |
| ENSG00000223658 | -1.620280247 | -0.506343137 | 5.14E-05    | 0.000792205 | C1GALT1C1L     | protein_coding                 | 1172   |
| ENSG00000221995 | -1.621318366 | 0.688804475  | 0.000117644 | 0.001587166 | TIAF1          | protein_coding                 | 5337   |
| ENSG00000256124 | -1.624700816 | -0.568238264 | 0.006858873 | 0.04061779  | LINC01152      | lincRNA                        | 639    |
| ENSG00000275494 | -1.631506325 | -1.389167447 | 0.001858283 | 0.014835459 | RP11-266L9.8   | sense_intronic                 | 534    |
| ENSG00000159713 | -1.633356194 | -0.258421197 | 0.004655313 | 0.030259533 | TPPP3          | protein_coding                 | 1116   |
| ENSG00000070669 | -1.633789334 | 6.92907987   | 4.88E-14    | 4.88E-12    | ASNS           | protein_coding                 | 1588   |
| ENSG00000129467 | -1.638155495 | -0.602775477 | 0.006357503 | 0.038451779 | ADCY4          | protein_coding                 | 897    |
| ENSG00000277969 | -1.638842774 | -0.878916067 | 0.000152575 | 0.001957666 | CTB-58E17.1    | lincRNA                        | 2296   |
| ENSG00000166106 | -1.641210156 | 2.210231968  | 3.33E-10    | 1.77E-08    | ADAMTS15       | protein_coding                 | 5673   |
| ENSG00000134955 | -1.642715478 | 0.457253689  | 1.80E-08    | 6.92E-07    | SLC37A2        | protein_coding                 | 2642.5 |
| ENSG00000280254 | -1.646867135 | -0.645626895 | 1.10E-05    | 0.000208554 | RP11-81A22.4   | TEC                            | 2106   |
| ENSG00000256028 | -1.647000489 | -1.155892055 | 0.006300279 | 0.03819452  | RP11-197N18.2  | processed_transcript           | 5618   |
| ENSG00000163659 | -1.648694318 | 4.731451915  | 3.04E-13    | 2.66E-11    | TIPARP         | protein_coding                 | 2700   |
| ENSG00000121454 | -1.654099064 | -0.479590256 | 0.008107651 | 0.045812097 | LHX4           | protein_coding                 | 721    |
| ENSG00000234432 | -1.654151427 | -0.610544078 | 1.04E-05    | 0.000199016 | RP11-1275H24.1 | lincRNA                        | 2651   |
| ENSG00000205790 | -1.656368258 | -1.386068601 | 0.00521015  | 0.033076947 | DPP9-AS1       | antisense                      | 3071   |
| ENSG00000111981 | -1.657026566 | 4.030873379  | 4.94E-11    | 3.02E-09    | ULBP1          | protein_coding                 | 3142   |
| ENSG00000272975 | -1.660471946 | -0.10853249  | 0.006281708 | 0.03811541  | MYHAS          | antisense                      | 2274   |
| ENSG00000167536 | -1.660927682 | -0.634790434 | 0.002087518 | 0.016233729 | DHRS13         | protein_coding                 | 1569   |
| ENSG00000110799 | -1.661023401 | -0.773974697 | 0.000571916 | 0.005732725 | VWF            | protein_coding                 | 688    |
| ENSG00000102760 | -1.661380978 | 1.592660788  | 4.01E-06    | 8.66E-05    | RGCC           | protein_coding                 | 601.5  |
| ENSG00000260083 | -1.665372292 | -0.793849072 | 0.000117917 | 0.001589809 | MIR762HG       | antisense                      | 1125   |
| ENSG00000235530 | -1.667212014 | -1.784650907 | 0.006440235 | 0.038862407 | AC087294.2     | antisense                      | 819.5  |
| ENSG00000230513 | -1.667234878 | 0.433313688  | 5.97E-08    | 2.05E-06    | THAP7-AS1      | antisense                      | 1720   |
| ENSG00000127863 | -1.670281995 | 2.592618119  | 2.85E-11    | 1.80E-09    | TNFRSF19       | protein_coding                 | 3276   |
| ENSG00000164236 | -1.672389214 | 3.928901924  | 1.44E-20    | 2.93E-18    | ANKRD33B       | protein_coding                 | 5389.5 |
| ENSG00000149809 | -1.673809797 | 0.06154488   | 0.000129665 | 0.001715802 | TM7SF2         | protein_coding                 | 792.5  |
| ENSG00000272277 | -1.67445761  | -0.993386509 | 0.000124999 | 0.001665771 | RP1-40E16.12   | antisense                      | 850    |
| ENSG00000257135 | -1.675143749 | -0.269679593 | 6.98E-05    | 0.001022624 | RP11-320M2.1   | lincRNA                        | 1234.5 |
| ENSG00000139289 | -1.679330699 | 4.948815835  | 1.83E-42    | 2.19E-39    | PHLDA1         | protein_coding                 | 5913   |
| ENSG00000246731 | -1.680308593 | -1.427567893 | 0.002907769 | 0.020996162 | MGC16275       | antisense                      | 588    |
| ENSG00000226200 | -1.681234146 | 0.702495788  | 8.47E-05    | 0.001204598 | SGMS1-AS1      | antisense                      | 6664.5 |
| ENSG00000263843 | -1.684755827 | -1.636073775 | 0.006780417 | 0.040296932 | RP11-649A18.12 | antisense                      | 1536.5 |
| ENSG00000213693 | -1.685884803 | -0.215001362 | 2.50E-06    | 5.81E-05    | SEC14L1P1      | processed_pseudogene           | 2181   |
| ENSG00000279382 | -1.686064084 | 0.716263016  | 0.006656341 | 0.039816915 | RP11-449J21.3  | TEC                            | 1362   |
| ENSG00000108984 | -1.687629128 | 2.005398502  | 1.96E-06    | 4.66E-05    | MAP2K6         | protein_coding                 | 1512   |
| ENSG00000278500 | -1.688165634 | -0.491608385 | 0.004863941 | 0.031310959 | AC009336.19    | protein_coding                 | 3521   |
| ENSG00000274292 | -1.69394501  | -0.445948998 | 0.007860473 | 0.044955133 | RP11-347I19.7  | lincRNA                        | 2607   |
| ENSG00000260260 | -1.700136957 | 2.013974365  | 3.45E-15    | 4.11E-13    | SNHG19         | lincRNA                        | 342    |
| ENSG00000253210 | -1.701366586 | -1.057245148 | 0.005826297 | 0.035952559 | RP11-809O17.1  | antisense                      | 494    |
| ENSG00000133392 | -1.703734828 | -1.124921884 | 0.005453134 | 0.03423127  | MYH11          | protein_coding                 | 4087   |
| ENSG00000166793 | -1.716315432 | 0.035774007  | 0.004521653 | 0.029585756 | YPEL4          | protein_coding                 | 1263.5 |
| ENSG00000273888 | -1.720328719 | 0.139588855  | 4.02E-08    | 1.42E-06    | FRMD6-AS1      | antisense                      | 2229   |
| ENSG00000118407 | -1.722381842 | -1.333967348 | 0.008377316 | 0.04697694  | FILIP1         | protein_coding                 | 4315.5 |
| ENSG00000078814 | -1.72805559  | -0.447512366 | 0.00249604  | 0.018647365 | MYH7B          | protein_coding                 | 699    |
| ENSG00000213904 | -1.729755615 | -1.149510125 | 0.000637217 | 0.006235774 | LIPE-AS1       | antisense                      | 747.5  |
| ENSG00000131242 | -1.740988799 | -0.415223441 | 1.67E-05    | 0.000299195 | RAB11FIP4      | protein_coding                 | 581.5  |
| ENSG00000100784 | -1.744675046 | 0.205245198  | 1.85E-05    | 0.000325422 | RPS6KA5        | protein_coding                 | 2118   |
| ENSG00000081059 | -1.750174257 | 3.317150811  | 7.48E-14    | 7.10E-12    | TCF7           | protein_coding                 | 782.5  |
| ENSG00000261123 | -1.750256554 | -0.495568587 | 0.004191733 | 0.027903121 | RP11-304L19.3  | sense_intronic                 | 596    |

|                 |              |              |             |             |                |                                    |        |
|-----------------|--------------|--------------|-------------|-------------|----------------|------------------------------------|--------|
| ENSG00000274220 | -1.7511525   | -1.199779342 | 0.008100788 | 0.045798311 | RP11-77K12.9   | lincRNA                            | 2557   |
| ENSG00000265190 | -1.752496057 | -1.109851774 | 0.005477818 | 0.034323793 | ANXA8          | protein_coding                     | 1873   |
| ENSG00000101096 | -1.753881823 | 0.670833149  | 4.73E-09    | 2.10E-07    | NFATC2         | protein_coding                     | 2974   |
| ENSG00000223820 | -1.756093723 | -1.586024179 | 0.008867935 | 0.048907073 | CFL1P1         | transcribed_unprocessed_pseudogene | 447    |
| ENSG00000163739 | -1.760097787 | 1.126650306  | 1.65E-14    | 1.77E-12    | CXCL1          | protein_coding                     | 835.5  |
| ENSG00000279631 | -1.770554635 | 0.047828367  | 9.10E-07    | 2.35E-05    | RP11-573G6.4   | TEC                                | 2518   |
| ENSG00000114270 | -1.771359306 | 5.221900835  | 4.15E-27    | 1.56E-24    | COL7A1         | protein_coding                     | 709    |
| ENSG00000213213 | -1.783019201 | -0.715058051 | 0.004900875 | 0.031470457 | CCDC183        | protein_coding                     | 1496.5 |
| ENSG00000278611 | -1.787127531 | -1.514321727 | 0.002662675 | 0.019609293 | CTC-543D15.8   | lincRNA                            | 727    |
| ENSG00000259370 | -1.788920451 | 0.395883291  | 5.9E-08     | 2.05E-06    | RP11-1069G10.1 | antisense                          | 556    |
| ENSG00000259523 | -1.791869374 | -0.524002828 | 4.92E-06    | 0.000104261 | RP11-680F8.3   | antisense                          | 1451   |
| ENSG00000280161 | -1.793289245 | -1.59222865  | 0.001888571 | 0.015013594 | CTC-205M6.1    | TEC                                | 984    |
| ENSG00000163734 | -1.805178009 | -1.07982245  | 0.000913924 | 0.008453085 | CXCL3          | protein_coding                     | 929.5  |
| ENSG00000188710 | -1.80572842  | -1.418751636 | 0.006503311 | 0.039116194 | QRFP           | protein_coding                     | 1034.5 |
| ENSG00000100292 | -1.806562895 | 4.39847692   | 2.80E-46    | 4.14E-43    | HMOX1          | protein_coding                     | 751.5  |
| ENSG00000270419 | -1.807022471 | -1.552134965 | 0.000801013 | 0.007567597 | CAHM           | lincRNA                            | 896    |
| ENSG00000276791 | -1.807727387 | -1.101692677 | 7.80E-05    | 0.001124691 | CTD-2270P14.5  | lincRNA                            | 3250   |
| ENSG00000085741 | -1.809527005 | -0.024950064 | 4.06E-07    | 1.14E-05    | WNT11          | protein_coding                     | 625    |
| ENSG00000266947 | -1.812384192 | -1.256046306 | 0.000776147 | 0.007366283 | RP11-799D4.4   | antisense                          | 1595   |
| ENSG00000203546 | -1.81285655  | -0.853532926 | 1.77E-05    | 0.00031428  | RP11-176H8.1   | protein_coding                     | 749    |
| ENSG00000117394 | -1.818065496 | 5.306851705  | 1.02E-25    | 3.30E-23    | SLC2A1         | protein_coding                     | 591    |
| ENSG00000265972 | -1.820636755 | 7.769738291  | 6.43E-13    | 5.37E-11    | TXNIP          | protein_coding                     | 1367   |
| ENSG00000100036 | -1.821994167 | 3.365403058  | 2.07E-09    | 9.86E-08    | SLC35E4        | protein_coding                     | 2081   |
| ENSG00000198113 | -1.823168226 | 1.059814487  | 2.87E-10    | 1.57E-08    | TOR4A          | protein_coding                     | 4148   |
| ENSG00000146966 | -1.824366961 | 2.940593705  | 1.06E-20    | 2.18E-18    | DENND2A        | protein_coding                     | 2081   |
| ENSG00000230359 | -1.828421308 | -0.44173467  | 2.92E-05    | 0.000482989 | TP1P2          | transcribed_processed_pseudogene   | 1384.5 |
| ENSG00000128285 | -1.836111928 | -1.592595888 | 0.003680762 | 0.025107013 | MCHR1          | protein_coding                     | 1243   |
| ENSG00000228536 | -1.83681444  | -1.089461154 | 0.007987501 | 0.045480662 | RP11-392O17.1  | lincRNA                            | 811    |
| ENSG00000196747 | -1.839542329 | -1.944850434 | 0.005306453 | 0.033544362 | HIST1H2AI      | protein_coding                     | 503    |
| ENSG00000265321 | -1.841420622 | -1.175339309 | 0.001319982 | 0.011351959 | MIR4263        | miRNA                              | 83     |
| ENSG00000157111 | -1.846796258 | 1.670965223  | 1.85E-14    | 1.96E-12    | TMEM171        | protein_coding                     | 1391   |
| ENSG00000272143 | -1.848687937 | -1.528836157 | 0.003937131 | 0.026437761 | FGF14-AS2      | lincRNA                            | 1074   |
| ENSG00000246898 | -1.855783991 | -1.00025278  | 6.50E-05    | 0.00096067  | LINC00920      | lincRNA                            | 2147   |
| ENSG00000063438 | -1.856264469 | 3.774350421  | 5.46E-18    | 8.49E-16    | AHRR           | protein_coding                     | 646    |
| ENSG00000151062 | -1.860453515 | -0.802586564 | 0.000415455 | 0.004448633 | CACNA2D4       | protein_coding                     | 923.5  |
| ENSG00000260588 | -1.863577875 | -0.538149326 | 5.48E-06    | 0.000114425 | RP11-930P14.2  | lincRNA                            | 1770   |
| ENSG00000271576 | -1.863839153 | -0.936823047 | 0.000150925 | 0.001940109 | RP11-486G15.2  | lincRNA                            | 1601   |
| ENSG00000068615 | -1.874777414 | -2.262589628 | 0.007235593 | 0.042185219 | REEP1          | protein_coding                     | 958    |
| ENSG00000165474 | -1.875166172 | 0.466977824  | 4.50E-08    | 1.58E-06    | GJB2           | protein_coding                     | 2279.5 |
| ENSG00000158423 | -1.875742939 | -1.291090145 | 0.005384354 | 0.033995299 | RIBC1          | protein_coding                     | 1281   |
| ENSG00000236871 | -1.875822147 | 0.202713096  | 0.008528134 | 0.04755227  | LINC00106      | lincRNA                            | 363    |
| ENSG00000166592 | -1.877609699 | 0.902400906  | 3.28E-13    | 2.86E-11    | RRAD           | protein_coding                     | 681    |
| ENSG00000254639 | -1.883323129 | -1.420441163 | 5.16E-05    | 0.000794934 | CTD-2589M5.5   | lincRNA                            | 653    |
| ENSG00000123612 | -1.883328962 | -0.891720557 | 0.000465646 | 0.004870234 | ACVR1C         | protein_coding                     | 1643.5 |
| ENSG00000126860 | -1.890556252 | 3.361804604  | 1.53E-07    | 4.80E-06    | EVI2A          | protein_coding                     | 1854   |
| ENSG00000101265 | -1.893267222 | 4.060894298  | 7.35E-06    | 0.000147428 | RASSF2         | protein_coding                     | 5282   |
| ENSG00000184524 | -1.897334453 | -0.528139731 | 5.88E-07    | 1.58E-05    | CEND1          | protein_coding                     | 1060.5 |
| ENSG00000124116 | -1.898801436 | -1.364236498 | 0.000992972 | 0.009019059 | WFDC3          | protein_coding                     | 704    |
| ENSG00000269313 | -1.900815694 | -0.641615675 | 6.73E-06    | 0.000137691 | MAGIX          | protein_coding                     | 1057   |
| ENSG00000272702 | -1.902757465 | -1.158211917 | 0.000140372 | 0.001833056 | RP11-44N22.3   | processed_transcript               | 1582   |
| ENSG00000216775 | -1.903005957 | 2.478356033  | 5.76E-09    | 2.50E-07    | RP1-152L7.5    | transcribed_unprocessed_pseudogene | 1737.5 |
| ENSG00000224165 | -1.904903296 | -1.215559506 | 0.000871416 | 0.008103351 | DNAJC27-AS1    | antisense                          | 488    |
| ENSG00000173531 | -1.906353662 | 0.892215872  | 0.000751085 | 0.007171151 | MST1           | protein_coding                     | 859    |
| ENSG00000240875 | -1.906695655 | 0.710157714  | 7.97E-09    | 3.35E-07    | LINC00886      | lincRNA                            | 601    |
| ENSG00000100889 | -1.91062696  | 5.693134962  | 1.17E-14    | 1.29E-12    | PCK2           | protein_coding                     | 1350.5 |
| ENSG00000189120 | -1.914815532 | -1.209169036 | 3.46E-05    | 0.000563378 | SP6            | protein_coding                     | 3824   |
| ENSG00000149922 | -1.915759453 | -0.783962213 | 0.00013524  | 0.001780471 | TBX6           | protein_coding                     | 1796   |
| ENSG00000136826 | -1.916183138 | 5.321462382  | 5.97E-15    | 6.95E-13    | KLF4           | protein_coding                     | 2174.5 |
| ENSG00000279491 | -1.919237697 | -1.753876319 | 0.003294769 | 0.023040025 | RP11-810P12.7  | TEC                                | 1697   |
| ENSG00000228463 | -1.921072736 | -0.890574237 | 0.000266404 | 0.00309594  | AP006222.2     | lincRNA                            | 1292   |
| ENSG00000101255 | -1.933248367 | 6.104510031  | 6.17E-15    | 7.10E-13    | TRIB3          | protein_coding                     | 1301.5 |
| ENSG00000235706 | -1.934427123 | -0.933798723 | 0.001279295 | 0.011071011 | DICER1-AS1     | antisense                          | 1259.5 |
| ENSG00000103257 | -1.935810653 | 7.373804141  | 6.90E-22    | 1.62E-19    | SLC7A5         | protein_coding                     | 3983   |
| ENSG00000221883 | -1.953003107 | -0.239485755 | 3.54E-06    | 7.77E-05    | ARIH2OS        | protein_coding                     | 1598   |
| ENSG00000205041 | -1.957315364 | -1.57850839  | 0.007268712 | 0.042342547 | CTC-425O23.2   | sense_intronic                     | 1462   |
| ENSG00000102554 | -1.958698699 | 2.619422187  | 1.00E-14    | 1.11E-12    | KLF5           | protein_coding                     | 984    |
| ENSG00000149506 | -1.962155067 | -1.498305588 | 0.001842109 | 0.014734736 | ZP1            | protein_coding                     | 536    |
| ENSG00000263412 | -1.971954825 | -1.645517821 | 0.003036603 | 0.021684488 | RP5-890E16.2   | processed_transcript               | 1724.5 |
| ENSG00000246477 | -1.982539694 | -1.614659934 | 0.001701427 | 0.013844739 | AF131216.6     | antisense                          | 5856   |
| ENSG00000137868 | -1.98461069  | 0.672430634  | 8.75E-14    | 8.09E-12    | STRA6          | protein_coding                     | 2237.5 |
| ENSG00000180044 | -1.986485722 | 2.147286644  | 8.46E-09    | 3.52E-07    | C3orf80        | protein_coding                     | 2372   |
| ENSG00000141574 | -1.988372841 | 1.687344809  | 8.45E-07    | 2.19E-05    | SECTM1         | protein_coding                     | 712    |
| ENSG00000118094 | -1.991841302 | -1.34429476  | 0.000537188 | 0.005455921 | TREH           | protein_coding                     | 1718   |
| ENSG00000227268 | -1.994102633 | 0.630062052  | 2.71E-11    | 1.72E-09    | KLLN           | protein_coding                     | 4277   |
| ENSG00000235513 | -1.994183594 | 1.534278906  | 1.01E-06    | 2.58E-05    | RP4-756G23.5   | antisense                          | 1640   |
| ENSG00000135605 | -1.997639508 | -0.276245716 | 1.04E-05    | 0.0001997   | TEC            | protein_coding                     | 814    |
| ENSG00000236404 | -2.000055905 | -0.170268595 | 0.001209651 | 0.010552092 | VLDLR-AS1      | antisense                          | 887    |
| ENSG00000270177 | -2.00518118  | -1.689833928 | 0.001041471 | 0.009344813 | CTD-2410N18.3  | lincRNA                            | 1418   |
| ENSG00000154928 | -2.006303289 | 0.15735287   | 3.06E-09    | 1.41E-07    | EPHB1          | protein_coding                     | 566.5  |
| ENSG00000272223 | -2.007539038 | -1.947347479 | 0.006764254 | 0.040241578 | RP1-20C7.6     | antisense                          | 509    |

|                  |               |              |             |             |                |                                  |        |
|------------------|---------------|--------------|-------------|-------------|----------------|----------------------------------|--------|
| ENSG00000260285  | -2.008267791  | -0.738683796 | 1.16E-05    | 0.000218319 | RP11-600F24.7  | antisense                        | 4063   |
| ENSG00000231663  | -2.008377883  | -1.368418609 | 0.000859408 | 0.008025501 | RP5-827C21.4   | antisense                        | 575    |
| ENSG00000268218  | -2.011396752  | -1.076482433 | 0.007833631 | 0.044837895 | AC137932.4     | antisense                        | 3660   |
| ENSG00000272030  | -2.020530166  | -0.862409241 | 0.000309302 | 0.00351555  | RP1-178F15.4   | antisense                        | 691.5  |
| ENSG00000092068  | -2.028315323  | 2.920721017  | 3.26E-09    | 1.49E-07    | SLC7A8         | protein_coding                   | 1625.5 |
| ENSG00000258130  | -2.03274395   | -1.29165799  | 0.002897794 | 0.020931433 | RP11-347C12.3  | protein_coding                   | 569    |
| ENSG00000125864  | -2.032881779  | -1.261796063 | 0.001744317 | 0.014110569 | BFSP1          | protein_coding                   | 1384   |
| ENSG00000141294  | -2.046782001  | -1.228502334 | 0.00091387  | 0.008453085 | LRRC46         | protein_coding                   | 872    |
| ENSG00000262251  | -2.050713067  | -1.692626487 | 0.000327973 | 0.003673075 | RP11-199F11.2  | sense_intronic                   | 1112   |
| ENSG00000243819  | -2.058502767  | -1.452705998 | 0.001740527 | 0.014096431 | RN7SL832P      | lincRNA                          | 1756   |
| ENSG00000277287  | -2.063440133  | -0.883901811 | 0.000535064 | 0.00543702  | RP4-794I6.4    | lincRNA                          | 5678   |
| ENSG00000204396  | -2.066295631  | -1.418946044 | 0.003147328 | 0.022298141 | VWA7           | protein_coding                   | 853    |
| ENSG00000231784  | -2.069929498  | -1.130605333 | 2.94E-06    | 6.68E-05    | DBIL5P         | transcribed_unitary_pseudogene   | 672    |
| ENSG00000124440  | -2.073071093  | -0.138967079 | 0.001116776 | 0.009879241 | HIF3A          | protein_coding                   | 1031   |
| ENSG00000168517  | -2.077143564  | 0.635715661  | 1.88E-06    | 4.49E-05    | HEXIM2         | protein_coding                   | 799.5  |
| ENSG00000243056  | -2.079368112  | -0.383781967 | 0.00012608  | 0.001678012 | EIF4EBP3       | protein_coding                   | 691    |
| ENSG00000224934  | -2.07957242   | -0.988218589 | 0.003513536 | 0.024229709 | RP11-441O15.3  | lincRNA                          | 2998   |
| ENSG00000267416  | -2.080835693  | -1.706714638 | 0.007035687 | 0.041380871 | CTD-2319I12.2  | lincRNA                          | 699    |
| ENSG00000260274  | -2.085172092  | -1.044869644 | 0.000271761 | 0.003149354 | RP11-817O13.8  | lincRNA                          | 1430   |
| ENSG00000171368  | -2.085568968  | -1.952734561 | 0.000582685 | 0.005813806 | TPPP           | protein_coding                   | 6022   |
| ENSG00000010327  | -2.088864906  | -1.113218339 | 0.000933361 | 0.008598302 | STAB1          | protein_coding                   | 2160   |
| ENSG00000188385  | -2.091412706  | -0.88954755  | 0.003228512 | 0.022694924 | JAKMIP3        | protein_coding                   | 6033   |
| ENSG00000145911  | -2.09527979   | -0.857265086 | 1.50E-05    | 0.000271302 | N4BP3          | protein_coding                   | 6080   |
| ENSG00000064687  | -2.0981121243 | 1.796560082  | 3.84E-08    | 1.36E-06    | ABCA7          | protein_coding                   | 591    |
| ENSG000000257390 | -2.103823533  | -1.397607003 | 0.000259464 | 0.0030323   | RP11-762I7.5   | protein_coding                   | 782    |
| ENSG00000273084  | -2.10630552   | -1.199397727 | 5.03E-05    | 0.000779092 | RP11-1275H24.3 | lincRNA                          | 942    |
| ENSG00000225950  | -2.119360675  | -1.944942915 | 0.009101038 | 0.049939954 | NTF4           | protein_coding                   | 813    |
| ENSG00000167476  | -2.12286087   | -1.285239202 | 0.004976169 | 0.031845326 | JSRP1          | protein_coding                   | 843    |
| ENSG00000277449  | -2.12729305   | -1.307850689 | 0.000393749 | 0.004255823 | CEBPB-AS1      | antisense                        | 2648   |
| ENSG00000253948  | -2.155227942  | -0.878049007 | 1.05E-06    | 2.67E-05    | RP11-410L14.2  | lincRNA                          | 380    |
| ENSG00000111087  | -2.155314672  | 3.005776306  | 1.56E-09    | 7.58E-08    | GLI1           | protein_coding                   | 1990   |
| ENSG00000166924  | -2.156015219  | -1.607830145 | 0.005627308 | 0.0350188   | NYAP1          | protein_coding                   | 1786.5 |
| ENSG00000175264  | -2.160977904  | -0.385541084 | 5.64E-07    | 1.53E-05    | CHST1          | protein_coding                   | 1361   |
| ENSG00000267013  | -2.163746876  | 0.929928404  | 1.33E-13    | 1.21E-11    | CTD-2171N6.1   | lincRNA                          | 1821.5 |
| ENSG00000138061  | -2.165354224  | 6.733458408  | 2.46E-33    | 1.76E-30    | CYP1B1         | protein_coding                   | 745    |
| ENSG00000255153  | -2.173658056  | -1.13972885  | 3.81E-05    | 0.000612353 | TOLLIP-AS1     | antisense                        | 939    |
| ENSG00000154856  | -2.174954206  | 1.836868214  | 1.20E-11    | 8.07E-10    | APCDD1         | protein_coding                   | 788.5  |
| ENSG00000267194  | -2.179464106  | -0.454175816 | 0.000482396 | 0.005004975 | RP1-193H18.2   | lincRNA                          | 2504   |
| ENSG00000049249  | -2.183198554  | 1.779023757  | 1.53E-09    | 7.47E-08    | TNFRSF9        | protein_coding                   | 1253.5 |
| ENSG00000188042  | -2.187705817  | 5.695030507  | 6.76E-66    | 2.33E-62    | ARL4C          | protein_coding                   | 3699   |
| ENSG00000184792  | -2.192852268  | 1.972052324  | 7.51E-10    | 3.86E-08    | OSBP2          | protein_coding                   | 2468   |
| ENSG00000160111  | -2.195998151  | -1.44551011  | 0.008607824 | 0.047842036 | CPAMD8         | protein_coding                   | 643.5  |
| ENSG00000185065  | -2.198565268  | -2.301665035 | 0.00644684  | 0.038878163 | AC000068.5     | antisense                        | 2097   |
| ENSG00000138316  | -2.201213482  | 4.213303569  | 2.33E-16    | 3.18E-14    | ADAMTS14       | protein_coding                   | 5264.5 |
| ENSG00000256802  | -2.203941041  | -0.792771634 | 6.61E-08    | 2.25E-06    | RP11-680F8.1   | antisense                        | 1470   |
| ENSG00000228363  | -2.206045857  | -1.711530567 | 0.005148155 | 0.032735609 | AC015971.2     | antisense                        | 982.5  |
| ENSG00000273062  | -2.209533643  | -1.868455218 | 0.0048512   | 0.03125809  | RP11-428K3.1   | antisense                        | 1980   |
| ENSG00000122877  | -2.210283292  | 4.047992521  | 2.12E-28    | 9.73E-26    | EGR2           | protein_coding                   | 2824   |
| ENSG00000133863  | -2.213768332  | -2.225178066 | 0.002628825 | 0.019415241 | TEX15          | protein_coding                   | 1520   |
| ENSG00000102981  | -2.213823733  | -1.491787132 | 0.002053298 | 0.016033842 | PARD6A         | protein_coding                   | 1254   |
| ENSG00000164161  | -2.216004867  | -0.883136551 | 2.27E-05    | 0.000387598 | HHIP           | protein_coding                   | 704.5  |
| ENSG00000273619  | -2.218257901  | -0.430909954 | 3.10E-07    | 9.08E-06    | RP5-908M14.9   | antisense                        | 668    |
| ENSG00000259230  | -2.21903715   | -2.147901651 | 0.001723081 | 0.01397153  | CTD-2555C10.3  | lincRNA                          | 1603   |
| ENSG00000153094  | -2.220668024  | 2.87469973   | 1.69E-14    | 1.81E-12    | BCL2L11        | protein_coding                   | 936    |
| ENSG00000225138  | -2.221181382  | 1.848727289  | 2.76E-05    | 0.000460067 | CTD-2228K2.7   | processed_transcript             | 859    |
| ENSG00000271855  | -2.226424613  | -1.932947998 | 0.001656353 | 0.013515135 | RP11-214N9.1   | lincRNA                          | 877    |
| ENSG00000130783  | -2.234317841  | -1.666623873 | 0.004682785 | 0.030419008 | CCDC62         | protein_coding                   | 2707.5 |
| ENSG00000273783  | -2.23537757   | -1.370449115 | 3.89E-05    | 0.000624287 | CTD-2506P8.6   | antisense                        | 1130   |
| ENSG00000144230  | -2.244586591  | -1.734119106 | 0.002406363 | 0.01808834  | GPR17          | protein_coding                   | 1651.5 |
| ENSG00000162526  | -2.245239675  | -1.63044811  | 0.001035986 | 0.009299624 | TSSK3          | protein_coding                   | 494    |
| ENSG00000160781  | -2.255628002  | -1.380929026 | 0.005686497 | 0.035225033 | PAQR6          | protein_coding                   | 1799   |
| ENSG00000261485  | -2.255848944  | -0.90884163  | 5.29E-07    | 1.45E-05    | PAN3-AS1       | antisense                        | 1351   |
| ENSG00000265485  | -2.256781244  | -0.890483149 | 0.001224656 | 0.010669503 | RP11-449D8.1   | lincRNA                          | 1458.5 |
| ENSG00000152154  | -2.26207573   | -1.598227981 | 0.008435197 | 0.047173775 | TMEM178A       | protein_coding                   | 703.5  |
| ENSG00000204055  | -2.265674924  | -1.595696977 | 0.000135993 | 0.001788193 | RP11-247A12.2  | antisense                        | 1303   |
| ENSG00000243024  | -2.265972379  | -1.601290649 | 0.00044724  | 0.00471823  | RPS11P6        | transcribed_processed_pseudogene | 1242   |
| ENSG00000111644  | -2.266344636  | -1.857743946 | 0.007178564 | 0.041953984 | ACRBP          | protein_coding                   | 811    |
| ENSG00000272463  | -2.269682575  | -1.978708264 | 0.000772634 | 0.007343039 | RP11-532F6.3   | lincRNA                          | 2814   |
| ENSG00000229980  | -2.273617301  | -1.493961636 | 0.001001882 | 0.009080077 | TOB1-AS1       | processed_transcript             | 618.5  |
| ENSG00000108551  | -2.277304478  | -0.90769595  | 7.09E-05    | 0.001036682 | RASD1          | protein_coding                   | 1575   |
| ENSG00000101188  | -2.277928398  | 1.790185482  | 9.89E-09    | 4.04E-07    | NTSR1          | protein_coding                   | 3541   |
| ENSG00000228626  | -2.279426474  | -0.868844296 | 0.004996125 | 0.031913869 | RP11-495P10.9  | unprocessed_pseudogene           | 285    |
| ENSG00000154319  | -2.282909861  | 1.749586497  | 7.58E-22    | 1.74E-19    | FAM167A        | protein_coding                   | 1325   |
| ENSG00000196468  | -2.290390777  | -1.121301077 | 6.78E-06    | 0.00013843  | FGF16          | protein_coding                   | 1650   |
| ENSG00000272986  | -2.290947944  | -2.1648361   | 0.001732941 | 0.014040481 | RP11-46J23.1   | antisense                        | 745    |
| ENSG00000162620  | -2.297702837  | -1.993753335 | 0.004585039 | 0.029896592 | LRR1Q3         | protein_coding                   | 1338   |
| ENSG00000130518  | -2.299631644  | -0.598682089 | 0.001616269 | 0.013234996 | KIAA1683       | protein_coding                   | 2684   |
| ENSG00000275964  | -2.329146953  | 0.382328208  | 4.13E-13    | 3.52E-11    | RP11-61K9.3    | lincRNA                          | 1191   |
| ENSG00000185112  | -2.331046731  | 1.880497858  | 2.27E-15    | 2.75E-13    | FAM43A         | protein_coding                   | 2494   |
| ENSG00000129757  | -2.33242889   | 2.136081449  | 2.75E-08    | 1.00E-06    | CDKN1C         | protein_coding                   | 1570   |

|                 |              |              |             |             |                 |                                    |        |
|-----------------|--------------|--------------|-------------|-------------|-----------------|------------------------------------|--------|
| ENSG00000273802 | -2.335918117 | -1.067867687 | 1.75E-07    | 5.39E-06    | HIST1H2BG       | protein_coding                     | 1534   |
| ENSG00000275198 | -2.339087408 | -1.245904889 | 5.51E-05    | 0.000835916 | RP11-471B22.3   | lincRNA                            | 4609   |
| ENSG00000155980 | -2.339441244 | -0.882771427 | 8.27E-05    | 0.001182121 | KIF5A           | protein_coding                     | 3527   |
| ENSG00000186301 | -2.34873077  | -0.400448066 | 0.003657186 | 0.024970879 | MST1P2          | unprocessed_pseudogene             | 2291   |
| ENSG00000272172 | -2.350943476 | -1.947395254 | 0.006508862 | 0.039126859 | RP13-582O9.7    | antisense                          | 223    |
| ENSG00000277383 | -2.351801666 | -1.968314035 | 0.003208928 | 0.022587932 | CTD-3001H11.2   | antisense                          | 582    |
| ENSG00000251417 | -2.353080674 | -1.780139831 | 0.00298796  | 0.021448066 | RP11-1348G14.4  | lincRNA                            | 1963   |
| ENSG00000277715 | -2.358931423 | -1.579800979 | 0.001968767 | 0.015543729 | RP11-651L5.3    | antisense                          | 2028   |
| ENSG00000182366 | -2.367559388 | -1.174609417 | 1.58E-06    | 3.84E-05    | FAM87A          | lincRNA                            | 1221   |
| ENSG00000264107 | -2.368845478 | -1.210622594 | 0.001111682 | 0.009846806 | RP11-848P1.5    | antisense                          | 492    |
| ENSG00000174564 | -2.374293287 | 2.226943417  | 2.58E-07    | 7.68E-06    | IL20RB          | protein_coding                     | 1787   |
| ENSG00000229867 | -2.375194586 | -1.465176917 | 1.88E-05    | 0.000330572 | STEAP3-AS1      | antisense                          | 3218   |
| ENSG00000185338 | -2.379750991 | 1.418924365  | 9.27E-13    | 7.44E-11    | SOCS1           | protein_coding                     | 1225   |
| ENSG00000125378 | -2.379877074 | -1.083812076 | 0.000249882 | 0.002931668 | BMP4            | protein_coding                     | 1112   |
| ENSG00000223473 | -2.38349358  | -1.30548062  | 0.002132198 | 0.016506798 | GS1-124K5.3     | lincRNA                            | 714    |
| ENSG00000172508 | -2.385848933 | -1.874137781 | 0.003861982 | 0.026068376 | CARNS1          | protein_coding                     | 2968   |
| ENSG00000123329 | -2.39324617  | -1.294327202 | 0.002474158 | 0.018544094 | ARHGAP9         | protein_coding                     | 673    |
| ENSG00000270605 | -2.39943242  | -1.124929408 | 0.001427909 | 0.012055087 | RP5-1092A3.4    | antisense                          | 1945   |
| ENSG00000198417 | -2.401058531 | -1.297976213 | 0.001120581 | 0.009904447 | MT1F            | protein_coding                     | 553    |
| ENSG00000167992 | -2.402200708 | 0.91440438   | 1.12E-05    | 0.000211761 | VWCE            | protein_coding                     | 1256.5 |
| ENSG00000168062 | -2.403679568 | -2.166665348 | 0.004595829 | 0.029948089 | BATF2           | protein_coding                     | 1949   |
| ENSG00000274213 | -2.405684816 | -1.55319514  | 9.93E-05    | 0.001374146 | RP11-670E13.6   | lincRNA                            | 348    |
| ENSG00000247157 | -2.412700249 | -1.756052874 | 0.008320058 | 0.046744462 | LINC01252       | lincRNA                            | 502    |
| ENSG00000225335 | -2.419247912 | -1.861442677 | 0.001854185 | 0.014814164 | XXbac-B476C20.9 | antisense                          | 805    |
| ENSG00000165197 | -2.4236825   | 0.474650134  | 2.58E-06    | 5.97E-05    | VEGFD           | protein_coding                     | 1318.5 |
| ENSG00000251257 | -2.426201022 | -2.079265685 | 0.000841118 | 0.007888906 | CTD-2263F21.1   | antisense                          | 397.5  |
| ENSG00000130513 | -2.428469186 | 3.708152361  | 1.84E-10    | 1.03E-08    | GDF15           | protein_coding                     | 562    |
| ENSG00000178977 | -2.43554721  | -1.725849506 | 0.004416113 | 0.029027987 | LINC00324       | lincRNA                            | 2082   |
| ENSG00000100027 | -2.441486722 | -1.770047981 | 0.0020694   | 0.016132511 | YPEL1           | protein_coding                     | 1319   |
| ENSG00000272734 | -2.455303318 | 1.782392406  | 8.15E-07    | 2.12E-05    | ADIRF-AS1       | processed_transcript               | 2416   |
| ENSG00000260088 | -2.466686223 | -2.297527403 | 0.007533702 | 0.043470448 | RP11-92G12.3    | lincRNA                            | 736    |
| ENSG00000262075 | -2.468251324 | -2.088782857 | 0.007730128 | 0.043566669 | DKFZP434A062    | lincRNA                            | 3968.5 |
| ENSG00000163884 | -2.471231771 | -1.45428329  | 0.004745661 | 0.030759905 | KLF15           | protein_coding                     | 1560.5 |
| ENSG00000198208 | -2.474339677 | -1.221979968 | 5.64E-05    | 0.000853825 | RPS6KL1         | protein_coding                     | 1436.5 |
| ENSG00000251127 | -2.48798228  | -2.42749385  | 0.008036025 | 0.045606479 | RP11-280G9.1    | lincRNA                            | 2750   |
| ENSG00000230454 | -2.493063493 | -1.045898353 | 0.001094585 | 0.009728651 | U73166.2        | lincRNA                            | 430    |
| ENSG00000283078 | -2.493770591 | -1.98007971  | 0.002794497 | 0.020327094 | RP11-11M20.4    | lincRNA                            | 1608   |
| ENSG00000232739 | -2.495232797 | -2.338507593 | 0.007571918 | 0.04364232  | RP11-25G10.2    | antisense                          | 794    |
| ENSG00000066230 | -2.503964949 | -0.677737947 | 0.001682986 | 0.013721636 | SLC9A3          | protein_coding                     | 2504   |
| ENSG00000185271 | -2.504250956 | -1.085514893 | 9.77E-06    | 0.000188676 | KLHL33          | protein_coding                     | 2394   |
| ENSG00000255201 | -2.517057118 | -0.950313888 | 0.002330755 | 0.017686921 | RP11-350N15.4   | antisense                          | 534    |
| ENSG00000256508 | -2.517675977 | -1.478556658 | 0.003977011 | 0.026688246 | MRGPRF-AS1      | antisense                          | 542    |
| ENSG00000258708 | -2.518796849 | -1.742840141 | 0.000375407 | 0.00409821  | SLC25A21-AS1    | antisense                          | 1924   |
| ENSG00000227953 | -2.523595104 | -1.814314759 | 0.002504323 | 0.018689019 | LINC01341       | processed_transcript               | 595    |
| ENSG00000171094 | -2.535450335 | -0.72390747  | 8.32E-10    | 4.24E-08    | ALK             | protein_coding                     | 2190   |
| ENSG00000117425 | -2.53998576  | 0.752791037  | 7.99E-06    | 0.000157472 | PTCH2           | protein_coding                     | 4225   |
| ENSG00000254607 | -2.544155965 | -2.076259394 | 0.001784801 | 0.014398097 | RP11-115C10.1   | antisense                          | 403.5  |
| ENSG00000267546 | -2.5448325   | -2.131957146 | 0.008158687 | 0.04603767  | RP11-666A8.8    | antisense                          | 554    |
| ENSG00000145777 | -2.548953773 | -0.115146839 | 6.46E-09    | 2.78E-07    | TSLP            | protein_coding                     | 2411   |
| ENSG00000225756 | -2.551582684 | -0.942216771 | 0.00026411  | 0.003072731 | DBH-AS1         | antisense                          | 2139   |
| ENSG00000196220 | -2.55761635  | 2.242397646  | 1.94E-06    | 4.62E-05    | SRGAP3          | protein_coding                     | 1799   |
| ENSG00000237940 | -2.562497393 | -0.906665028 | 0.002305202 | 0.017544445 | AC093642.3      | lincRNA                            | 594.5  |
| ENSG00000125538 | -2.565068426 | -1.049901179 | 0.000123496 | 0.001648917 | IL1B            | protein_coding                     | 617.5  |
| ENSG00000137825 | -2.570615869 | -0.412918973 | 6.85E-09    | 2.91E-07    | ITPKA           | protein_coding                     | 853    |
| ENSG00000167178 | -2.572879489 | 1.393217949  | 1.44E-19    | 2.67E-17    | ISLR2           | protein_coding                     | 1471   |
| ENSG00000214796 | -2.575052548 | -2.132423474 | 0.00145268  | 0.012209236 | RP11-480I12.5   | transcribed_unprocessed_pseudogene | 961    |
| ENSG00000177173 | -2.584295307 | -2.168272352 | 0.003010569 | 0.021559843 | NAP1L4P1        | processed_pseudogene               | 1157   |
| ENSG00000123689 | -2.58478551  | 3.101656667  | 1.21E-10    | 6.95E-09    | G0S2            | protein_coding                     | 866    |
| ENSG00000244040 | -2.589656846 | -1.897871209 | 0.000865024 | 0.008058383 | IL12A-AS1       | antisense                          | 988    |
| ENSG00000171658 | -2.603227014 | -0.452283853 | 0.001403511 | 0.011926673 | NMRAL1P1        | transcribed_unprocessed_pseudogene | 574    |
| ENSG00000229160 | -2.603358729 | -1.966861393 | 0.005449262 | 0.034217335 | AC009229.6      | lincRNA                            | 351    |
| ENSG00000181790 | -2.612256178 | -1.575415841 | 0.000505542 | 0.005190511 | ADGRB1          | protein_coding                     | 5527   |
| ENSG00000137841 | -2.617471831 | -1.574043223 | 0.000867217 | 0.008071552 | PLCB2           | protein_coding                     | 563    |
| ENSG00000257108 | -2.646655979 | -1.369410552 | 3.99E-05    | 0.000637086 | NHLRC4          | protein_coding                     | 2084   |
| ENSG00000262155 | -2.646726504 | -2.318411105 | 0.001702783 | 0.013850327 | RP11-266L9.5    | lincRNA                            | 1875   |
| ENSG00000183778 | -2.65242642  | -2.539310953 | 0.00221591  | 0.017008629 | B3GALT5         | protein_coding                     | 2611.5 |
| ENSG00000214814 | -2.655937845 | 0.330572334  | 1.62E-05    | 0.000290684 | FER1L6          | protein_coding                     | 6051   |
| ENSG00000225077 | -2.65905578  | -1.966817715 | 0.000377093 | 0.004112284 | LINC00337       | lincRNA                            | 1220   |
| ENSG00000229774 | -2.704694568 | -2.767578345 | 0.007636039 | 0.043926313 | AC018866.1      | lincRNA                            | 397    |
| ENSG00000233559 | -2.712584209 | -2.165977765 | 0.007224808 | 0.04214607  | AC016831.7      | lincRNA                            | 1616   |
| ENSG00000250539 | -2.712630898 | -1.963065182 | 0.003274383 | 0.022947272 | KRT8P33         | processed_pseudogene               | 1423   |
| ENSG00000123700 | -2.722482852 | -0.813186748 | 2.60E-06    | 5.98E-05    | KCNJ2           | protein_coding                     | 3538.5 |
| ENSG00000280334 | -2.723399316 | -1.541831952 | 0.003708646 | 0.02524732  | RP11-361L15.5   | TEC                                | 2810   |
| ENSG00000242852 | -2.723757084 | -2.515605422 | 0.003072581 | 0.021899844 | ZNF709          | protein_coding                     | 798    |
| ENSG00000004799 | -2.731788376 | 1.424635166  | 7.89E-11    | 4.67E-09    | PDK4            | protein_coding                     | 691    |
| ENSG00000272525 | -2.75248447  | -2.224051256 | 0.000517018 | 0.005292601 | RP11-79P5.9     | lincRNA                            | 744    |
| ENSG00000270019 | -2.769221079 | -2.242418343 | 0.00909721  | 0.049932179 | RP11-141B14.1   | lincRNA                            | 1548   |
| ENSG00000188649 | -2.771533431 | -1.729166685 | 0.000431944 | 0.004582547 | CC2D2B          | protein_coding                     | 1428   |
| ENSG00000232615 | -2.775613617 | -2.361473435 | 0.002152473 | 0.016638729 | CTD-2012J19.1   | processed_pseudogene               | 1075   |
| ENSG00000252498 | -2.80313615  | -2.117442565 | 0.008083049 | 0.045749972 | RNU6-1016P      | snRNA                              | 94     |

|                 |              |              |             |             |                |                                    |        |
|-----------------|--------------|--------------|-------------|-------------|----------------|------------------------------------|--------|
| ENSG00000233695 | -2.81829075  | 1.463966938  | 2.32E-08    | 8.65E-07    | GAS6-AS1       | antisense                          | 4493   |
| ENSG00000236969 | -2.839652045 | -2.301940709 | 0.002569847 | 0.01909543  | GGT8P          | unprocessed_pseudogene             | 532    |
| ENSG00000175197 | -2.855984339 | 4.234794732  | 3.07E-09    | 1.41E-07    | DDIT3          | protein_coding                     | 928.5  |
| ENSG00000269194 | -2.867131113 | -2.127084272 | 0.00030246  | 0.003447244 | AC006942.4     | antisense                          | 520    |
| ENSG00000164746 | -2.870701502 | -2.404230229 | 0.002037565 | 0.015941042 | C7orf57        | protein_coding                     | 1942   |
| ENSG00000279283 | -2.878946795 | -2.399737692 | 0.007965528 | 0.04539299  | RP11-417L19.5  | TEC                                | 1740   |
| ENSG00000231317 | -2.881214063 | -2.278444687 | 0.008296437 | 0.04664972  | RP11-310H4.6   | unprocessed_pseudogene             | 1948   |
| ENSG00000130487 | -2.883335143 | 1.009185169  | 0.007386318 | 0.042870871 | KLHDC7B        | protein_coding                     | 2991   |
| ENSG00000189350 | -2.886442489 | -2.766121848 | 0.006781783 | 0.040296932 | FAM179A        | protein_coding                     | 720    |
| ENSG00000113739 | -2.890763053 | 6.118994047  | 7.64E-13    | 6.28E-11    | STC2           | protein_coding                     | 582    |
| ENSG00000110076 | -2.910281755 | -0.55803568  | 2.12E-08    | 8.01E-07    | NRXN2          | protein_coding                     | 853    |
| ENSG00000233622 | -2.921611797 | -1.576884456 | 1.13E-05    | 0.000213476 | CYP2T1P        | unitary_pseudogene                 | 1285   |
| ENSG00000143994 | -2.922489144 | -2.364721373 | 0.001242482 | 0.010802079 | ABHD1          | protein_coding                     | 1277   |
| ENSG00000206026 | -2.928655625 | -1.585596903 | 6.19E-05    | 0.000920065 | SMIM21         | protein_coding                     | 1834   |
| ENSG00000229178 | -2.928968563 | -2.360192859 | 0.001263888 | 0.010965164 | AC069513.4     | lincRNA                            | 1684   |
| ENSG00000279205 | -2.932428068 | -2.468284825 | 0.000770762 | 0.007332368 | RP11-632P5.1   | TEC                                | 1624   |
| ENSG00000243224 | -2.95040741  | -1.265606672 | 2.43E-06    | 5.65E-05    | RP5-1157M23.2  | antisense                          | 1078.5 |
| ENSG00000246339 | -2.967021432 | -1.921923745 | 0.003339004 | 0.02329765  | EXTL3-AS1      | antisense                          | 836.5  |
| ENSG00000168209 | -2.972541743 | 6.647051307  | 4.14E-14    | 4.14E-12    | DDIT4          | protein_coding                     | 753    |
| ENSG00000251079 | -2.977111651 | -1.54418104  | 0.000852914 | 0.007985081 | BMS1P2         | transcribed_unprocessed_pseudogene | 1595.5 |
| ENSG00000175874 | -2.986159191 | -1.509825877 | 1.42E-05    | 0.000257957 | CREG2          | protein_coding                     | 906    |
| ENSG00000222020 | -2.988416814 | -1.624518544 | 0.000335573 | 0.003750343 | AC062017.1     | antisense                          | 414    |
| ENSG00000137078 | -2.989896285 | -1.828945571 | 4.61E-06    | 9.86E-05    | SIT1           | protein_coding                     | 1082   |
| ENSG00000078795 | -2.999636177 | -2.636470158 | 0.003875289 | 0.026141162 | PKD2L2         | protein_coding                     | 2185   |
| ENSG00000223461 | -3.004122456 | -2.663036907 | 0.004279149 | 0.028339268 | AC004471.9     | antisense                          | 582    |
| ENSG00000162755 | -3.015306789 | -1.902903778 | 0.003128753 | 0.022197105 | KLHDC9         | protein_coding                     | 848.5  |
| ENSG00000197046 | -3.032514309 | 0.489805958  | 4.19E-14    | 4.17E-12    | SIGLEC15       | protein_coding                     | 1054   |
| ENSG00000141431 | -3.055277504 | -1.430429747 | 4.59E-06    | 9.83E-05    | ASXL3          | protein_coding                     | 565    |
| ENSG00000156042 | -3.060608306 | -1.185001228 | 6.24E-05    | 0.000926411 | CFAP70         | protein_coding                     | 1556.5 |
| ENSG00000253616 | -3.077414637 | -2.135161386 | 0.000886374 | 0.008223976 | RP11-875O11.3  | antisense                          | 467    |
| ENSG00000230325 | -3.079626311 | -2.537986287 | 0.009056165 | 0.049794195 | RP11-385F5.4   | antisense                          | 494    |
| ENSG00000245468 | -3.084681914 | -2.466833869 | 0.007995343 | 0.045494205 | RP11-367J11.3  | lincRNA                            | 1500   |
| ENSG00000140090 | -3.087911901 | -2.662794735 | 0.007007744 | 0.041275132 | SLC24A4        | protein_coding                     | 4302   |
| ENSG00000250657 | -3.122690595 | -0.922910319 | 0.001178988 | 0.010340146 | RP11-1E6.1     | processed_transcript               | 551.5  |
| ENSG00000267871 | -3.130942454 | -2.128138533 | 0.001044759 | 0.009366196 | CTC-444N24.6   | antisense                          | 613.5  |
| ENSG00000272808 | -3.132720899 | -2.061409661 | 0.001020517 | 0.009184655 | RP11-66B24.7   | processed_transcript               | 5068   |
| ENSG00000185933 | -3.14612498  | -2.661255206 | 0.007892599 | 0.045101498 | CALHM1         | protein_coding                     | 3053   |
| ENSG00000243431 | -3.146154042 | -2.098284103 | 0.004335061 | 0.028572497 | RPL5P30        | processed_pseudogene               | 891    |
| ENSG00000155961 | -3.148033112 | 1.638348256  | 2.31E-08    | 8.62E-07    | RAB39B         | protein_coding                     | 3505   |
| ENSG00000223723 | -3.164712323 | -2.300269818 | 0.007352075 | 0.04272001  | BX842568.2     | processed_pseudogene               | 1230   |
| ENSG00000227744 | -3.173048918 | -1.889006642 | 3.13E-05    | 0.000513261 | FLJ43879       | lincRNA                            | 3489   |
| ENSG00000169129 | -3.186854528 | -0.542362475 | 5.27E-07    | 1.44E-05    | AFAP1L2        | protein_coding                     | 2332.5 |
| ENSG00000187627 | -3.192212722 | -2.79893129  | 0.006928557 | 0.040971871 | RGPD1          | protein_coding                     | 6095   |
| ENSG00000263982 | -3.193442422 | -2.491460836 | 0.001862559 | 0.014863871 | RP11-504I13.3  | antisense                          | 398    |
| ENSG00000128165 | -3.193740949 | 4.755620272  | 6.98E-08    | 2.36E-06    | ADM2           | protein_coding                     | 2405.5 |
| ENSG00000258902 | -3.194976924 | -2.491491695 | 0.003408932 | 0.023681839 | CTD-2128A3.2   | lincRNA                            | 558    |
| ENSG00000281912 | -3.212030603 | -1.967143493 | 0.003406772 | 0.023674777 | LINC01144      | lincRNA                            | 1710   |
| ENSG00000231105 | -3.238386182 | -2.467856986 | 0.006784469 | 0.040296932 | RP5-1071N3.1   | antisense                          | 2479   |
| ENSG00000267365 | -3.246345394 | -2.385422012 | 0.001828156 | 0.014662778 | KCNJ2-AS1      | antisense                          | 2442   |
| ENSG00000281026 | -3.252058019 | -1.900942759 | 0.000444569 | 0.004694844 | N4BP2L2-IT2    | sense_intronic                     | 4890   |
| ENSG00000163909 | -3.254518802 | -1.735852136 | 1.90E-05    | 0.000333353 | HEYL           | protein_coding                     | 3661   |
| ENSG00000230224 | -3.26279606  | -2.067586538 | 0.007906053 | 0.045141012 | PHBP9          | processed_pseudogene               | 825    |
| ENSG00000166823 | -3.269691684 | -1.871124477 | 9.12E-05    | 0.001280992 | MESP1          | protein_coding                     | 1410   |
| ENSG00000236056 | -3.279251021 | -2.614444657 | 0.006271117 | 0.038093509 | GAPDHP14       | processed_pseudogene               | 937    |
| ENSG00000199575 | -3.319386973 | -2.385568457 | 0.006202935 | 0.037759538 | SNORD114-1     | snoRNA                             | 72     |
| ENSG00000218052 | -3.32586075  | -0.72492782  | 9.65E-12    | 6.64E-10    | ADAMTS7P4      | transcribed_unprocessed_pseudogene | 511.5  |
| ENSG00000226091 | -3.32635838  | -2.562969873 | 0.007189934 | 0.042001789 | LINC00937      | lincRNA                            | 624    |
| ENSG00000118307 | -3.328092242 | -1.979970265 | 0.000630452 | 0.006184761 | CASC1          | protein_coding                     | 1774   |
| ENSG00000049283 | -3.340738163 | -1.803534575 | 0.000340252 | 0.003786286 | EPN3           | protein_coding                     | 601    |
| ENSG00000124882 | -3.345102837 | -0.134198229 | 2.17E-09    | 1.03E-07    | EREG           | protein_coding                     | 1290   |
| ENSG00000249755 | -3.351778288 | -2.284383818 | 0.002042609 | 0.015969606 | RP11-466G12.2  | processed_pseudogene               | 657    |
| ENSG00000196666 | -3.360478105 | -2.051397136 | 0.002486762 | 0.018611623 | FAM180B        | protein_coding                     | 1388   |
| ENSG00000135577 | -3.362771849 | -2.636439106 | 0.002093735 | 0.016268832 | NMBR           | protein_coding                     | 877.5  |
| ENSG00000151812 | -3.365434844 | -1.837825793 | 0.00045858  | 0.004823122 | SLC35F4        | protein_coding                     | 1071.5 |
| ENSG00000280025 | -3.370376746 | -1.814742119 | 1.50E-05    | 0.000271302 | CTA-992D9.8    | lincRNA                            | 4254   |
| ENSG00000259644 | -3.371621811 | -2.769609271 | 0.002006621 | 0.015758481 | RP11-680F8.4   | sense_intronic                     | 1346   |
| ENSG00000267882 | -3.381671526 | -2.539370347 | 0.001132799 | 0.009987767 | RP4-569M23.5   | antisense                          | 2253   |
| ENSG00000103710 | -3.386505558 | -2.223852939 | 0.000163606 | 0.002076463 | RASL12         | protein_coding                     | 1523   |
| ENSG00000245667 | -3.387351181 | -2.471205334 | 0.005323611 | 0.033632291 | RP5-940J5.8    | antisense                          | 560    |
| ENSG00000182261 | -3.403128095 | -1.123754332 | 5.47E-05    | 0.000832517 | NLRP10         | protein_coding                     | 1386.5 |
| ENSG00000206344 | -3.424243093 | -2.172721618 | 0.005639238 | 0.035038396 | HCG27          | protein_coding                     | 783    |
| ENSG00000256443 | -3.453869721 | -2.099923787 | 0.006120944 | 0.037347857 | RP11-794G24.1  | lincRNA                            | 1831   |
| ENSG00000251287 | -3.467693805 | -2.25894794  | 0.000436351 | 0.0046222   | ALG1L2         | protein_coding                     | 815    |
| ENSG00000186715 | -3.474085264 | -2.146904341 | 0.004793435 | 0.031011325 | MT1L           | transcribed_unprocessed_pseudogene | 2185   |
| ENSG00000119608 | -3.484650664 | -2.152085225 | 0.006698121 | 0.039905461 | PROX2          | protein_coding                     | 3359   |
| ENSG00000172349 | -3.485065158 | 1.415367358  | 1.28E-17    | 1.93E-15    | IL16           | protein_coding                     | 2158   |
| ENSG00000262481 | -3.520282593 | -1.957913105 | 0.000459525 | 0.004828163 | TMEM256-PLSCR3 | protein_coding                     | 1238.5 |
| ENSG00000274414 | -3.553226967 | -2.18314915  | 0.004528797 | 0.029623139 | RP5-965G21.4   | lincRNA                            | 2335   |
| ENSG00000227533 | -3.560449958 | -1.521130976 | 7.36E-06    | 0.000147552 | SLC2A1-AS1     | lincRNA                            | 2099.5 |
| ENSG00000113722 | -3.563045428 | -0.683071454 | 2.84E-08    | 1.03E-06    | CDX1           | protein_coding                     | 1550.5 |

|                 |              |              |             |             |                  |                                  |        |
|-----------------|--------------|--------------|-------------|-------------|------------------|----------------------------------|--------|
| ENSG00000118898 | -3.576846372 | 0.685217941  | 1.31E-06    | 3.26E-05    | PPL              | protein_coding                   | 2256   |
| ENSG00000280168 | -3.583693527 | -2.564937927 | 0.000522576 | 0.005332219 | RP11-1090M7.3    | TEC                              | 802    |
| ENSG00000242798 | -3.633925389 | -1.811631951 | 0.001457449 | 0.012231455 | RP11-506M12.1    | antisense                        | 572    |
| ENSG00000269901 | -3.662413407 | -2.261512039 | 0.000364575 | 0.004009547 | RP11-178L8.9     | antisense                        | 450    |
| ENSG00000276953 | -3.698080722 | -2.103018355 | 0.002028401 | 0.015899381 | TRBV12-4         | TR_V_gene                        | 406    |
| ENSG00000230415 | -3.702254669 | -1.693668389 | 0.000273239 | 0.003162944 | RP5-902P8.10     | lincRNA                          | 328.5  |
| ENSG00000233006 | -3.766038682 | -2.166741751 | 0.000947566 | 0.008678968 | AC034220.3       | processed_transcript             | 670    |
| ENSG00000197769 | -3.773644591 | 1.703386904  | 5.81E-13    | 4.87E-11    | MAP1LC3C         | protein_coding                   | 1182   |
| ENSG00000151012 | -3.7976776   | 5.564998221  | 9.73E-15    | 1.09E-12    | SLC7A11          | protein_coding                   | 5221   |
| ENSG00000263818 | -3.808328454 | -1.954464445 | 0.001567326 | 0.012941684 | CTD-2206N4.4     | transcribed_processed_pseudogene | 1046   |
| ENSG00000157445 | -3.909542367 | -0.482250665 | 1.18E-14    | 1.29E-12    | CACNA2D3         | protein_coding                   | 2634   |
| ENSG00000241935 | -3.950193924 | -1.944802924 | 4.69E-05    | 0.000733921 | HOGA1            | protein_coding                   | 2243.5 |
| ENSG00000162641 | -4.000718804 | -2.187696128 | 0.000167877 | 0.002113413 | AKNAD1           | protein_coding                   | 2638   |
| ENSG00000249628 | -4.023237161 | -1.585338719 | 1.91E-05    | 0.000335239 | LINC00942        | lincRNA                          | 2417   |
| ENSG00000145242 | -4.225795792 | -2.32218569  | 1.77E-06    | 4.27E-05    | EPHA5            | protein_coding                   | 6721   |
| ENSG00000111728 | -4.234881576 | -1.127894981 | 1.73E-08    | 6.66E-07    | ST8SIA1          | protein_coding                   | 572    |
| ENSG00000141469 | -4.240768598 | 0.316645441  | 2.91E-08    | 1.05E-06    | SLC14A1          | protein_coding                   | 779    |
| ENSG00000139269 | -4.241445518 | 3.940201337  | 4.32E-09    | 1.94E-07    | INHBE            | protein_coding                   | 1142   |
| ENSG00000099960 | -4.242059095 | -0.330897037 | 1.44E-08    | 5.68E-07    | SLC7A4           | protein_coding                   | 2307   |
| ENSG00000130540 | -4.265072336 | -2.285287102 | 0.000154438 | 0.001976148 | SULT4A1          | protein_coding                   | 2353.5 |
| ENSG00000226744 | -4.423630431 | -0.751326263 | 5.12E-06    | 0.000107826 | AC079781.5       | processed_pseudogene             | 123    |
| ENSG00000221947 | -4.606438899 | -2.711078766 | 0.008336283 | 0.046822913 | XKR9             | protein_coding                   | 1799   |
| ENSG00000223776 | -4.623397507 | -2.913590548 | 0.007944388 | 0.045309924 | LGALS8-AS1       | antisense                        | 1443.5 |
| ENSG00000164142 | -4.624885247 | -2.582765297 | 0.007527622 | 0.043452225 | FAM160A1         | protein_coding                   | 567.5  |
| ENSG00000238164 | -4.632490643 | -2.512730046 | 0.007028014 | 0.041370993 | RP3-395M20.8     | antisense                        | 1218.5 |
| ENSG00000267277 | -4.639292201 | -2.560333123 | 0.003911956 | 0.026337027 | CTD-2342J14.6    | antisense                        | 682    |
| ENSG00000263426 | -4.657063424 | -2.443989172 | 0.007483693 | 0.043278356 | RN7SL471P        | misc_RNA                         | 299    |
| ENSG00000189045 | -4.748312596 | -2.449318456 | 0.003603443 | 0.024652691 | ANKDD1B          | protein_coding                   | 1303   |
| ENSG00000279645 | -4.753174161 | -2.853939129 | 0.004300118 | 0.028450847 | RP11-759A24.1    | TEC                              | 4198   |
| ENSG00000149646 | -4.754580263 | -2.740126664 | 0.007453303 | 0.043138749 | CNBD2            | protein_coding                   | 1722   |
| ENSG00000188305 | -4.773452228 | -2.539445627 | 0.003450074 | 0.023911507 | C19orf35         | protein_coding                   | 2574   |
| ENSG00000253730 | -4.776760532 | -2.944096941 | 0.003896465 | 0.026258348 | RP11-893F2.13    | antisense                        | 547    |
| ENSG00000205334 | -4.852166495 | -2.740921932 | 0.00669467  | 0.039905461 | LINC01460        | lincRNA                          | 2860   |
| ENSG00000267193 | -4.853175422 | -2.945595465 | 0.006691528 | 0.039900622 | RP11-116O18.3    | antisense                        | 430    |
| ENSG00000281021 | -4.880793982 | -2.883692555 | 0.001724941 | 0.013981133 | RP1-12G14.9      | antisense                        | 744    |
| ENSG00000128965 | -4.886141688 | 4.374374303  | 8.72E-11    | 5.08E-09    | CHAC1            | protein_coding                   | 1498   |
| ENSG00000099957 | -4.891969234 | -1.059977639 | 3.80E-09    | 1.71E-07    | P2RX6            | protein_coding                   | 1834   |
| ENSG00000099937 | -4.895693766 | -2.663176344 | 0.001304135 | 0.011253053 | SERPIND1         | protein_coding                   | 2117.5 |
| ENSG00000198658 | -4.929194173 | -2.851823525 | 0.003527421 | 0.02430474  | ABHD17AP1        | unprocessed_pseudogene           | 933    |
| ENSG00000241684 | -4.978302619 | -2.254077227 | 0.003158743 | 0.022318119 | ADAMTS9-AS2      | antisense                        | 2179   |
| ENSG00000231443 | -4.986670949 | -2.56206518  | 0.005090281 | 0.032405358 | AC024937.6       | processed_pseudogene             | 1242   |
| ENSG00000253125 | -4.998066462 | -2.713997772 | 0.001600612 | 0.013143168 | RP11-459E5.1     | processed_transcript             | 570    |
| ENSG00000229728 | -5.000105049 | -2.635411409 | 0.000798442 | 0.007551089 | RP11-314N13.3    | antisense                        | 480    |
| ENSG00000087085 | -5.007732684 | -2.610946088 | 0.001011682 | 0.009124967 | ACHE             | protein_coding                   | 1484   |
| ENSG00000184357 | -5.03554793  | -2.797269125 | 0.002323016 | 0.017641119 | HIST1H1B         | protein_coding                   | 681    |
| ENSG00000233397 | -5.08473669  | -2.613902748 | 0.003301137 | 0.023064526 | AC008063.3       | lincRNA                          | 619    |
| ENSG00000267293 | -5.104723164 | -2.447992911 | 0.00030836  | 0.003506766 | RP11-8H2.1       | processed_pseudogene             | 1524   |
| ENSG00000249180 | -5.159737323 | -2.797677921 | 0.002948513 | 0.021253308 | CTC-506B8.1      | antisense                        | 565    |
| ENSG00000070388 | -5.201653699 | -2.689257766 | 0.000526534 | 0.005366135 | FGF22            | protein_coding                   | 1311   |
| ENSG00000238097 | -5.202841619 | -2.885256264 | 0.000157693 | 0.002014593 | RP11-513G11.3    | lincRNA                          | 1195   |
| ENSG00000249947 | -5.228663142 | -2.493078186 | 0.00635259  | 0.038444121 | XBP1P1           | processed_pseudogene             | 652    |
| ENSG00000197768 | -5.251060348 | -2.661809361 | 0.001385961 | 0.011796902 | STPG3            | protein_coding                   | 1015   |
| ENSG00000124602 | -5.252238653 | -2.638149185 | 0.000958874 | 0.008751571 | UNC5CL           | protein_coding                   | 1620   |
| ENSG00000265425 | -5.293487773 | -2.797844921 | 0.000240821 | 0.002840073 | RP11-128D14.1    | lincRNA                          | 755    |
| ENSG00000279943 | -5.295468354 | -2.742411426 | 0.000122521 | 0.001642263 | FLJ38576         | TEC                              | 2459   |
| ENSG00000231196 | -5.359798625 | -0.88161397  | 0.000194512 | 0.002379291 | RP11-495P10.7    | processed_transcript             | 1141.5 |
| ENSG00000269904 | -5.500763551 | -2.71543063  | 0.001972582 | 0.015556053 | MAP2K4P1         | transcribed_processed_pseudogene | 1867   |
| ENSG00000104826 | -5.506513027 | -2.223674758 | 8.57E-05    | 0.001216166 | LHB              | protein_coding                   | 514    |
| ENSG00000273933 | -5.54696766  | -2.263929335 | 0.001857336 | 0.014833618 | RP11-48O20.5     | unprocessed_pseudogene           | 845    |
| ENSG00000225173 | -5.640688952 | -2.297048489 | 0.000778623 | 0.007386398 | XXbac-BPG308K3.5 | lincRNA                          | 709    |
| ENSG00000187905 | -5.711142604 | -2.667682294 | 0.004855769 | 0.031270757 | LRRC74B          | protein_coding                   | 2201   |
| ENSG00000100341 | -5.728487595 | -2.640156407 | 0.004221722 | 0.028057651 | PNPLA5           | protein_coding                   | 2197   |
| ENSG00000250033 | -5.736624079 | -2.067770914 | 0.000147848 | 0.001906469 | SLC7A11-AS1      | processed_transcript             | 764    |
| ENSG00000145506 | -5.847850946 | -0.569211553 | 4.52E-12    | 3.34E-10    | NKD2             | protein_coding                   | 1060   |
| ENSG00000215912 | -6.107605215 | -2.344223688 | 3.36E-06    | 7.45E-05    | TTC34            | protein_coding                   | 5294.5 |
| ENSG00000233806 | -6.995615032 | -1.502396982 | 5.54E-06    | 0.000115462 | LINC01237        | processed_transcript             | 573    |
| ENSG00000183134 | -8.740152173 | -0.563581531 | 7.46E-13    | 6.15E-11    | PTGDR2           | protein_coding                   | 2895   |
